# Supplementary material
Source: MDPI journal article supplement (https://www.mdpi.com/1424-8247/14/5/399)
Supplement: s1 [file s1]

## **Supporting Information**

Figure S1-  $^1\text{H}$ ,  $^{13}\text{C}$  NMR and dept-135 Spectra of 1:

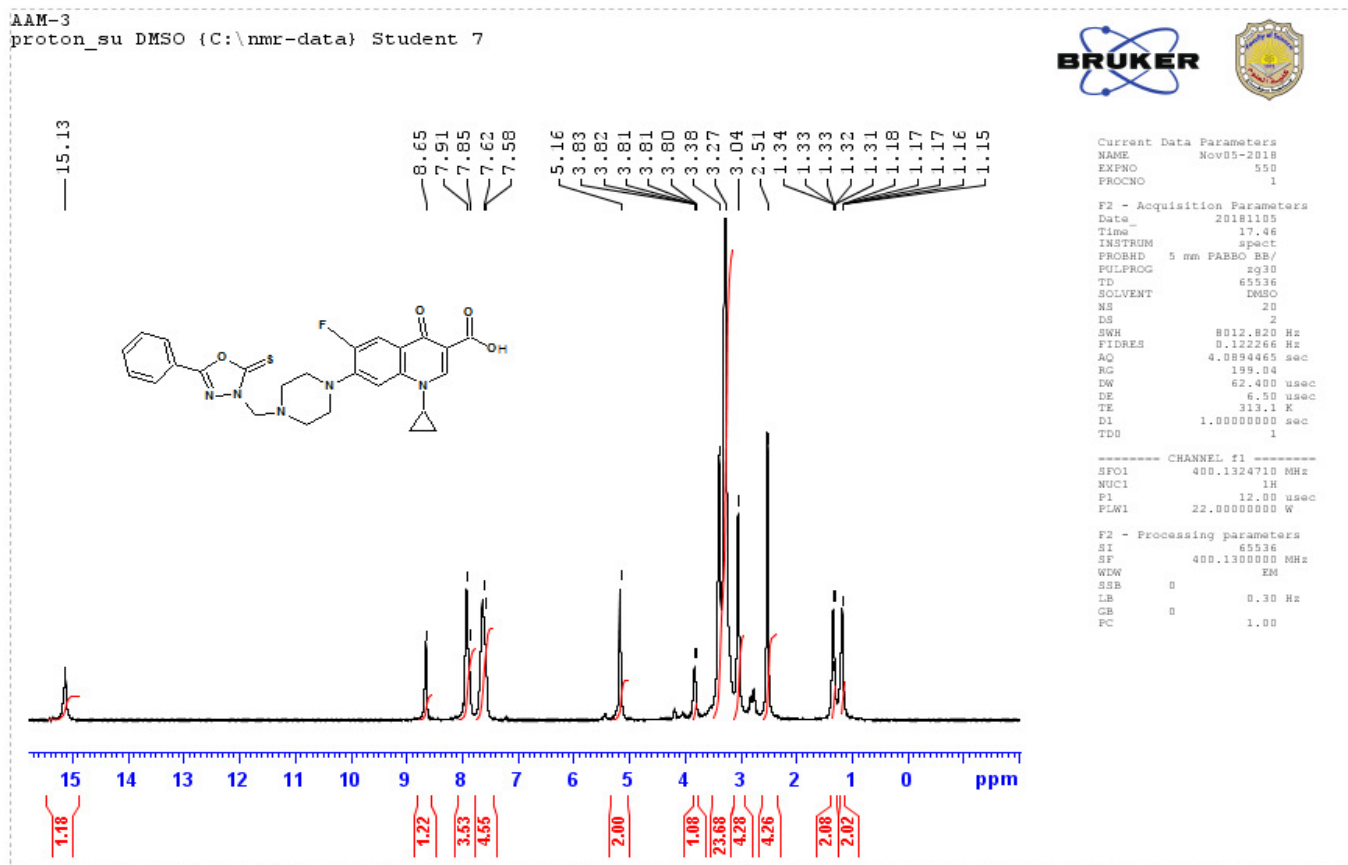

AAM-3  
proton\_su DMSO {C:\nmr-data} Student 7

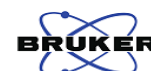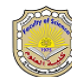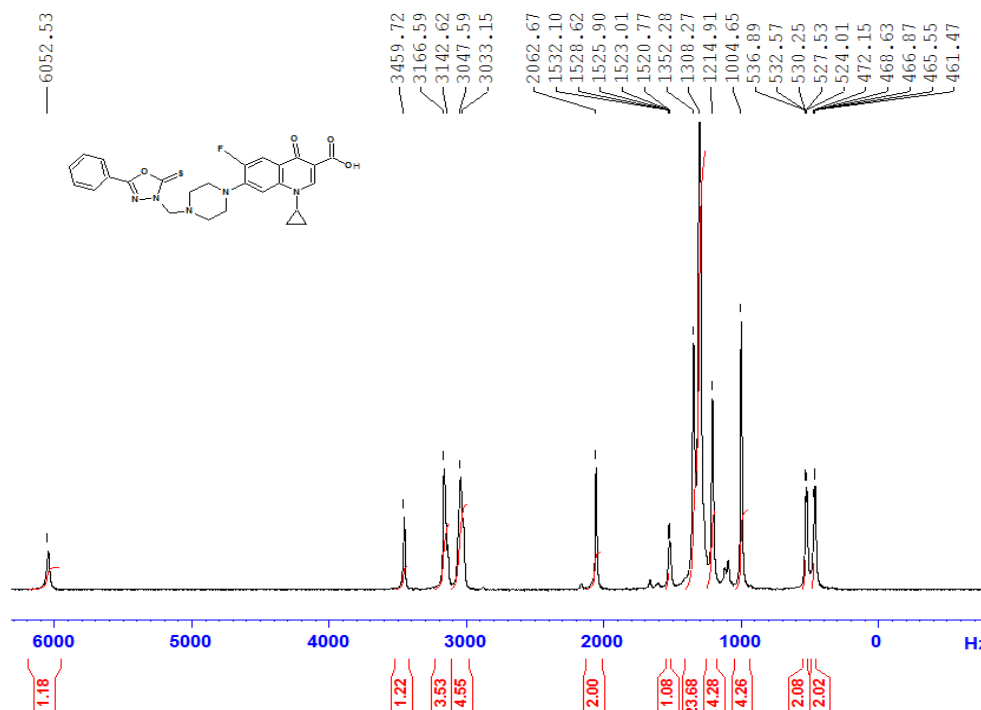

Current Data Parameters  
NAME Nov05-2018  
EXPNO 550  
PROCNO 1

F2 - Acquisition Parameters  
Date\_ 20181105  
Time 17.46  
INSTRUM spect  
PROBHD 5 mm PABBO BB/  
PULPROG zg30  
TD 65536  
SOLVENT DMSO  
NS 2  
DS 2  
SWH 8012.820 Hz  
FIDRES 0.122266 Hz  
AQ 4.0894465 sec  
RG 199.04  
DW 62.400 usec  
DE 6.50 usec  
TE 313.1 K  
D1 1.0000000 sec  
TD0 1

===== CHANNEL f1 =====  
SF01 400.1324710 MHz  
NUC1 1H  
P1 12.00 usec  
PLW1 22.00000000 W

F2 - Processing parameters  
SI 65536  
SF 400.1300000 MHz  
WDW EM  
SSB 0  
LB 0.30 Hz  
GB 0  
PC 1.00

AAM-3  
c13\_su DMSO {C:\nmr-data} Student 12

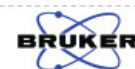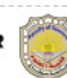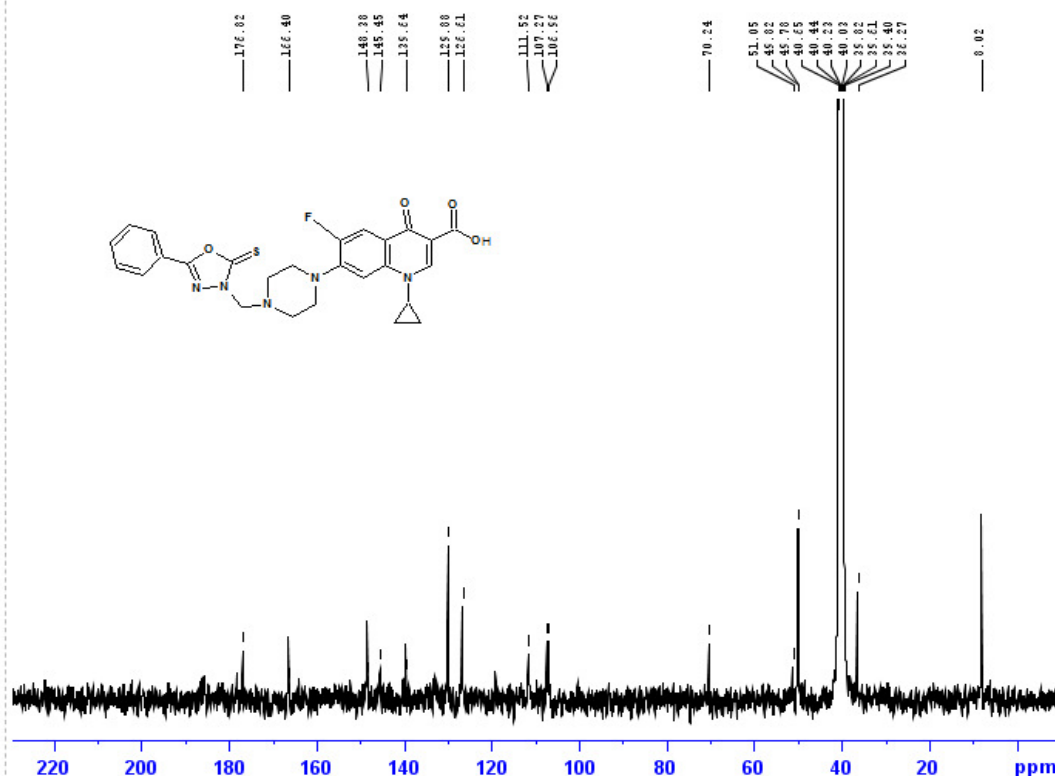

Current Data Parameters  
NAME Dec25-2018  
EXPNO 50  
PROCNO 1

F2 - Acquisition Parameters  
Date\_ 20181225  
Time 11.36  
INSTRUM spect  
PROBHD 5 mm PABBO BB/  
PULPROG waltz16  
TD 65536  
SOLVENT DMSO  
NS 1100  
DS 4  
SWH 24030.461 Hz  
FIDRES 0.366798 Hz  
AQ 1.3631488 sec  
RG 175.84  
DW 20.800 usec  
DE 6.50 usec  
TE 313.2 K  
D1 2.0000000 sec  
D11 0.02000000 sec  
TD0 1

===== CHANNEL f1 =====  
SF01 100.6230364 MHz  
NUC1 13C  
P1 5.50 usec  
PLW1 56.00000000 W

===== CHANNEL f2 =====  
SF02 400.1316005 MHz  
NUC2 1H  
CPDPRG12 waltz16  
P2PC2 50.00 usec  
PLW2 22.00000000 W  
PLW12 0.41051001 W  
PLW13 0.23204000 W

F2 - Processing parameters  
SI 32768  
SF 100.6127650 MHz  
WDW EM  
SSB 0  
LB 6.00 Hz  
GB 0  
PC 1.40

## S2- $^1\text{H}$ , $^{13}\text{C}$ NMR and dept-135 Spectra of 2

AAM-19  
proton\_su DMSO (C:\nmr-data) Student 22

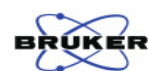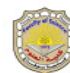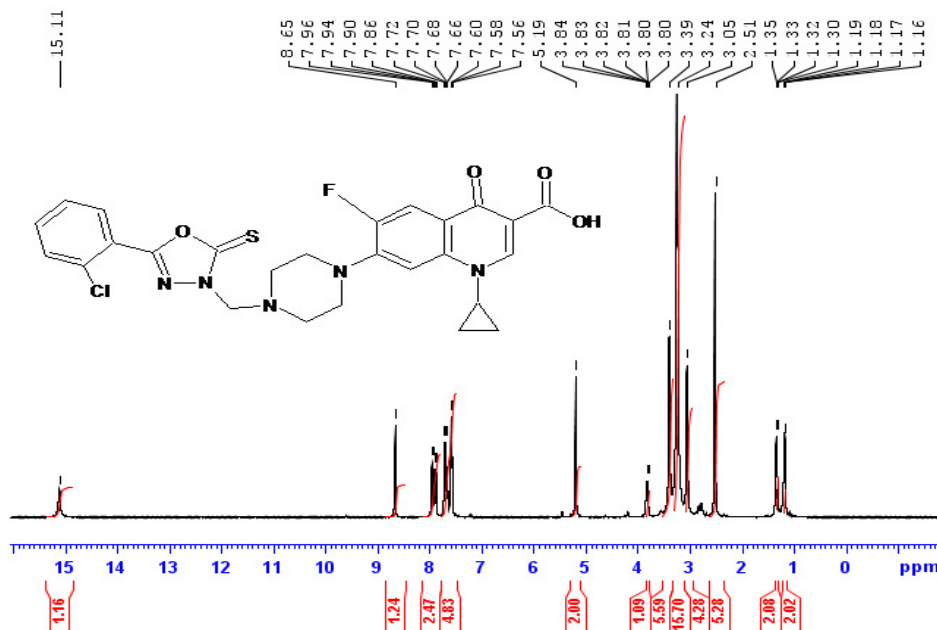

Current Data Parameters  
NAME Jan03-2019  
EXPNO 110  
PROCNO 1

F2 - Acquisition Parameters  
Date\_ 20190103  
Time 12.26  
INSTRUM spect  
PROBHD 5 mm PABBO BB/  
PULPROG zg30  
TD 65536  
SOLVENT DMSO  
NS 25  
DS 2  
SWH 8012.820 Hz  
FIDRES 0.122266 Hz  
AQ 4.0894465 sec  
RG 199.04  
DW 62.400 usec  
DE 6.50 usec  
TE 318.1 K  
D1 1.00000000 sec  
TD0 1

CHANNEL f1  
SFO1 400.1324710 MHz  
NUC1 1H  
P1 12.00 usec  
PLW1 22.00000000 W

F2 - Processing parameters  
SI 65536  
SF 400.1300000 MHz  
WDW EM  
SSB 0  
LB 0.30 Hz  
GB 0  
PC 1.00

AAM-19  
proton\_su DMSO (C:\nmr-data) Student 22

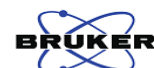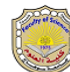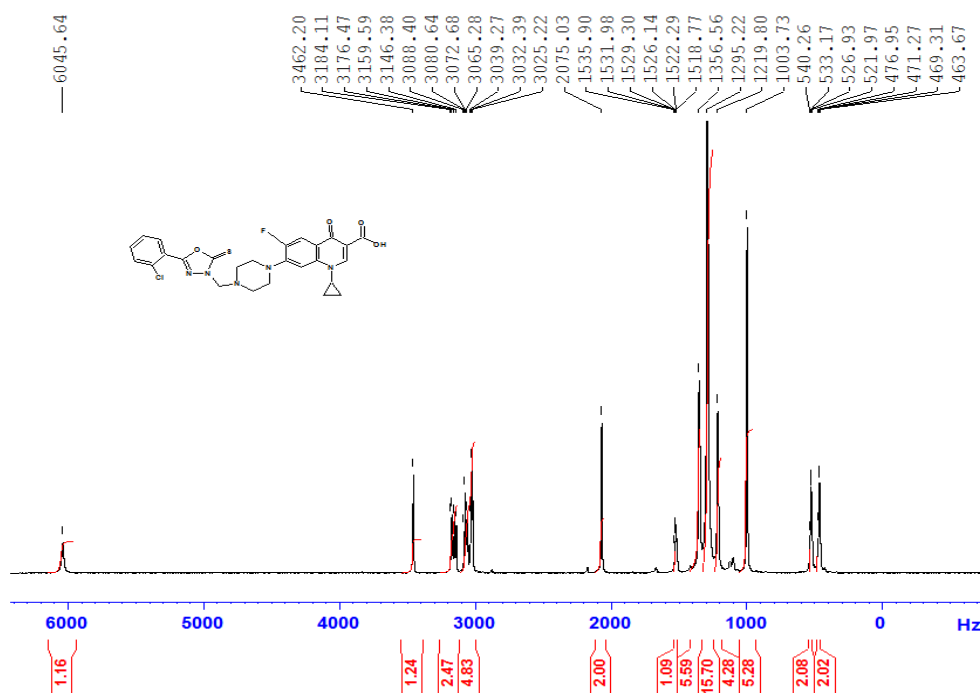

Current Data Parameters  
NAME Jan03-2019  
EXPNO 110  
PROCNO 1

F2 - Acquisition Parameters  
Date\_ 20190103  
Time 12.26  
INSTRUM spect  
PROBHD 5 mm PABBO BB/  
PULPROG zg30  
TD 65536  
SOLVENT DMSO  
NS 25  
DS 2  
SWH 8012.820 Hz  
FIDRES 0.122266 Hz  
AQ 4.0894465 sec  
RG 199.04  
DW 62.400 usec  
DE 6.50 usec  
TE 318.1 K  
D1 1.00000000 sec  
TD0 1

CHANNEL f1  
SFO1 400.1324710 MHz  
NUC1 13C  
P1 12.00 usec  
PLW1 22.00000000 W

F2 - Processing parameters  
SI 65536  
SF 400.1300000 MHz  
WDW EM  
SSB 0  
LB 0.30 Hz  
GB 0  
PC 1.00

AAM-19  
c13\_su DMSO {C:\nmr-data} Student 2

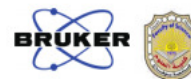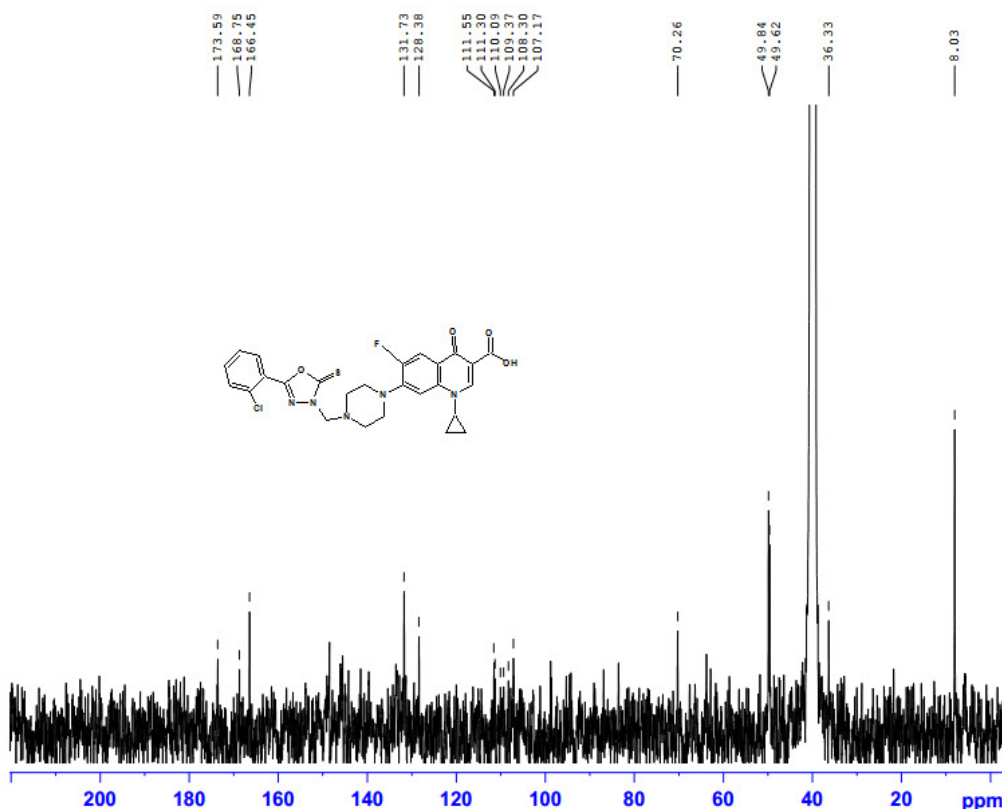

Current Data Parameters  
NAME Jan15-2019  
EXPNO 70  
PROCNO 1

F2 - Acquisition Parameters  
Date\_ 20190116  
Time\_ 12.34  
INSTRUM spect  
PROBHD 5 mm PABBO BB/  
PULPROG zgpg30  
TD 65536  
SOLVENT DMSO  
NS 1200  
DS 4  
SWH 24038.461 Hz  
FIDRES 0.366798 Hz  
AQ 1.3631488 sec  
RG 100.43  
DW 20.800 usec  
DE 6.50 usec  
TE 294.6 K  
D1 2.00000000 sec  
D11 0.03000000 sec  
TD0 1

CHANNEL f1  
SFO1 100.6238364 MHz  
NUC1 13C  
P1 9.50 usec  
PLW1 56.00000000 W

CHANNEL f2  
SFO2 400.1316005 MHz  
NUC2 1H  
CPOPRG2 waltz16  
PCPD2 90.00 usec  
PLW2 22.00000000 W  
PLW12 0.41091001 W  
PLW13 0.33284000 W

F2 - Processing parameters  
SI 32768  
SF 100.6127690 MHz  
WDW EM  
SSB 0  
LB 6.00 Hz  
GB 0  
PC 1.40

### S3-<sup>1</sup>H, <sup>13</sup>C NMR and dept-135 Spectra of 3

AAM-22  
proton\_su DMSO {C:\nmr-data} Student 11

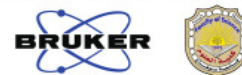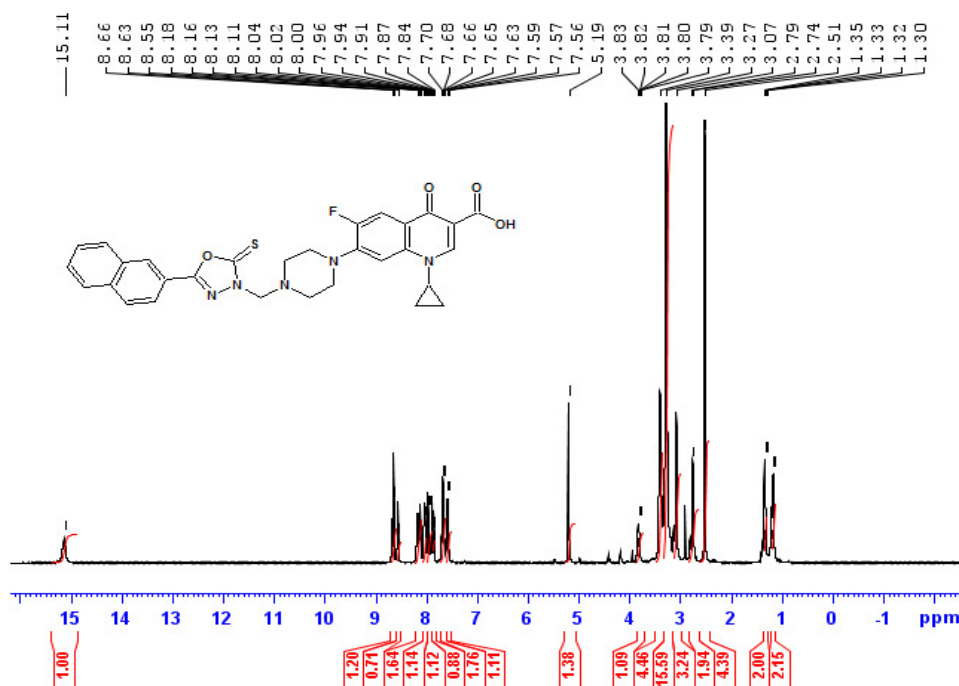

Current Data Parameters  
NAME Jan14-2019  
EXPNO 268  
PROCNO 1

F2 - Acquisition Parameters  
Date\_ 20190114  
Time\_ 17.54  
INSTRUM spect  
PROBHD 5 mm PABBO BB/  
PULPROG zg30  
TD 65536  
SOLVENT DMSO  
NS 20  
DS 2  
SWH 8012.820 Hz  
FIDRES 0.122266 Hz  
AQ 4.0894465 sec  
RG 199.04  
DW 62.400 usec  
DE 6.50 usec  
TE 313.2 K  
D1 1.00000000 sec  
TD0 1

CHANNEL f1  
SFO1 400.1324718 MHz  
NUC1 1H  
P1 12.00 usec  
PLW1 22.00000000 W

F2 - Processing parameters  
SI 65536  
SF 400.1300000 MHz  
WDW EM  
SSB 0  
LB 0.30 Hz  
GB 0  
PC 1.00

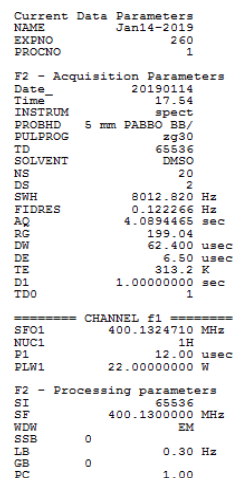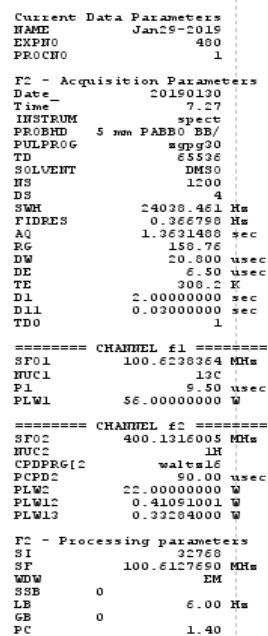

# S4- $^1\text{H}$ , $^{13}\text{C}$ NMR and dept-135 Spectra of 4

AAM-11  
proton\_su DMSO {C:\nmr-data} Student 9

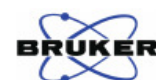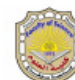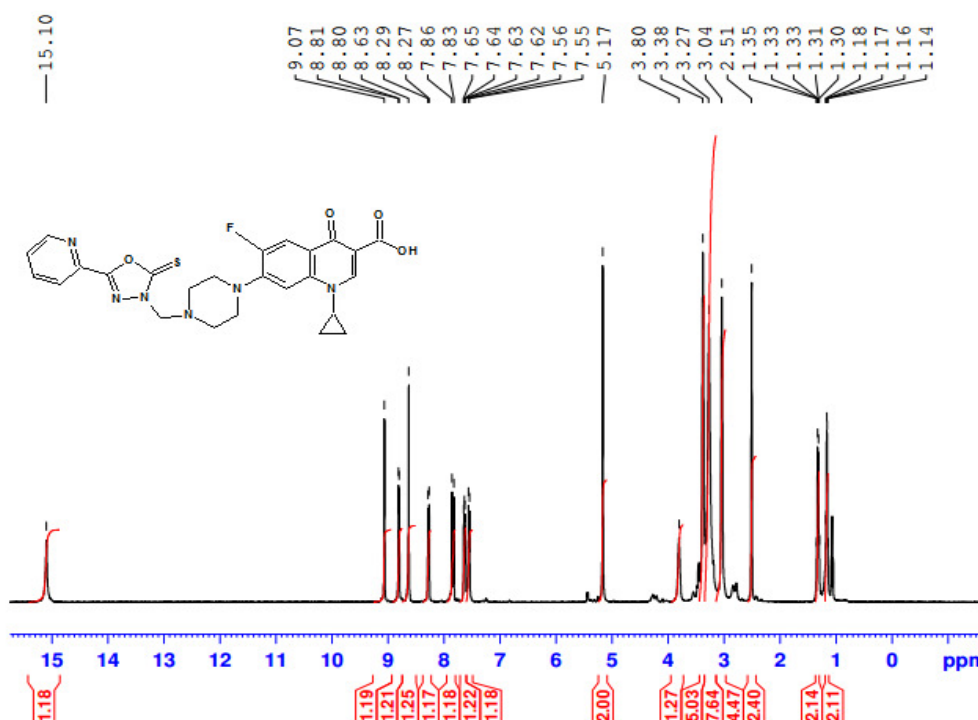

Current Data Parameters  
NAME Jan14-2019  
EXPNO 110  
PROCNO 1

F2 - Acquisition Parameters  
Date\_ 20190114  
Time 17.40  
INSTRUM spect  
PROBHD 5 mm PABBO BB/  
PULPROG zg30  
TD 65536  
SOLVENT DMSO  
NS 20  
DS 2  
SWH 8012.820 Hz  
FIDRES 0.122266 Hz  
AQ 4.0894465 sec  
RG 175.84  
DW 62.400 usec  
DE 6.50 usec  
TE 313.2 K  
D1 1.00000000 sec  
TD0 1

===== CHANNEL f1 =====  
SFO1 400.1324710 MHz  
NUC1 1H  
P1 12.00 usec  
PLW1 22.00000000 W

F2 - Processing parameters  
SI 65536  
SF 400.1300000 MHz  
WDW EM  
SSB 0  
LB 0.30 Hz  
GB 0  
PC 1.00

AAM-11  
proton\_su DMSO {C:\nmr-data} Student 9

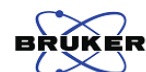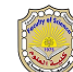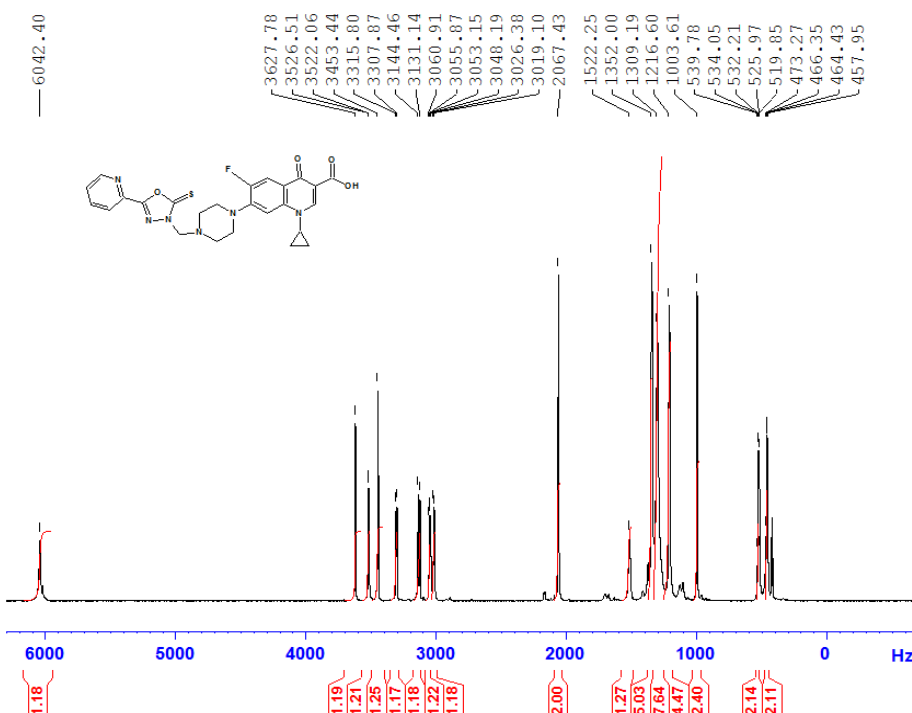

Current Data Parameters  
NAME Jan14-2019  
EXPNO 110  
PROCNO 1

F2 - Acquisition Parameters  
Date\_ 20190114  
Time 17.40  
INSTRUM spect  
PROBHD 5 mm PABBO BB/  
PULPROG zg30  
TD 65536  
SOLVENT DMSO  
NS 20  
DS 2  
SWH 8012.820 Hz  
FIDRES 0.122266 Hz  
AQ 4.0894465 sec  
RG 175.84  
DW 62.400 usec  
DE 6.50 usec  
TE 313.2 K  
D1 1.00000000 sec  
TD0 1

===== CHANNEL f1 =====  
SFO1 400.1324710 MHz  
NUC1 1H  
P1 12.00 usec  
PLW1 22.00000000 W

F2 - Processing parameters  
SI 65536  
SF 400.1300000 MHz  
WDW EM  
SSB 0  
LB 0.30 Hz  
GB 0  
PC 1.00



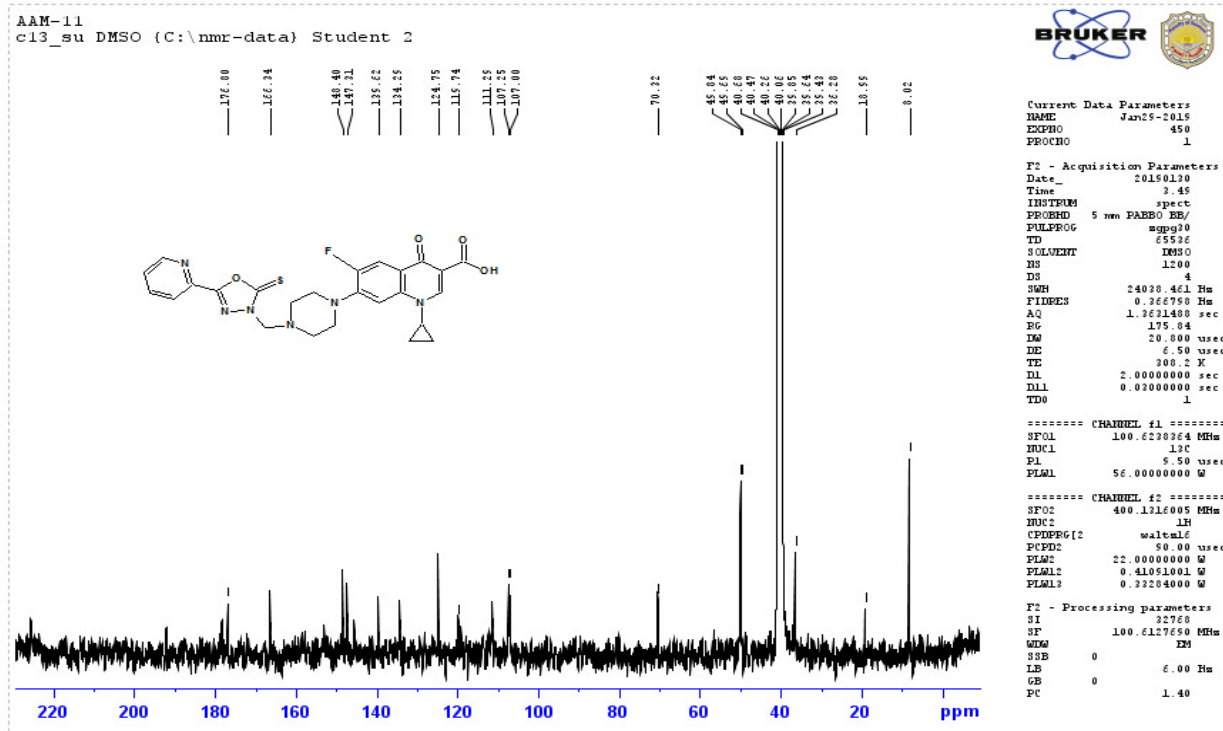

## S5- $^1\text{H}$ , $^{13}\text{C}$ NMR and dept-135 Spectra of 5

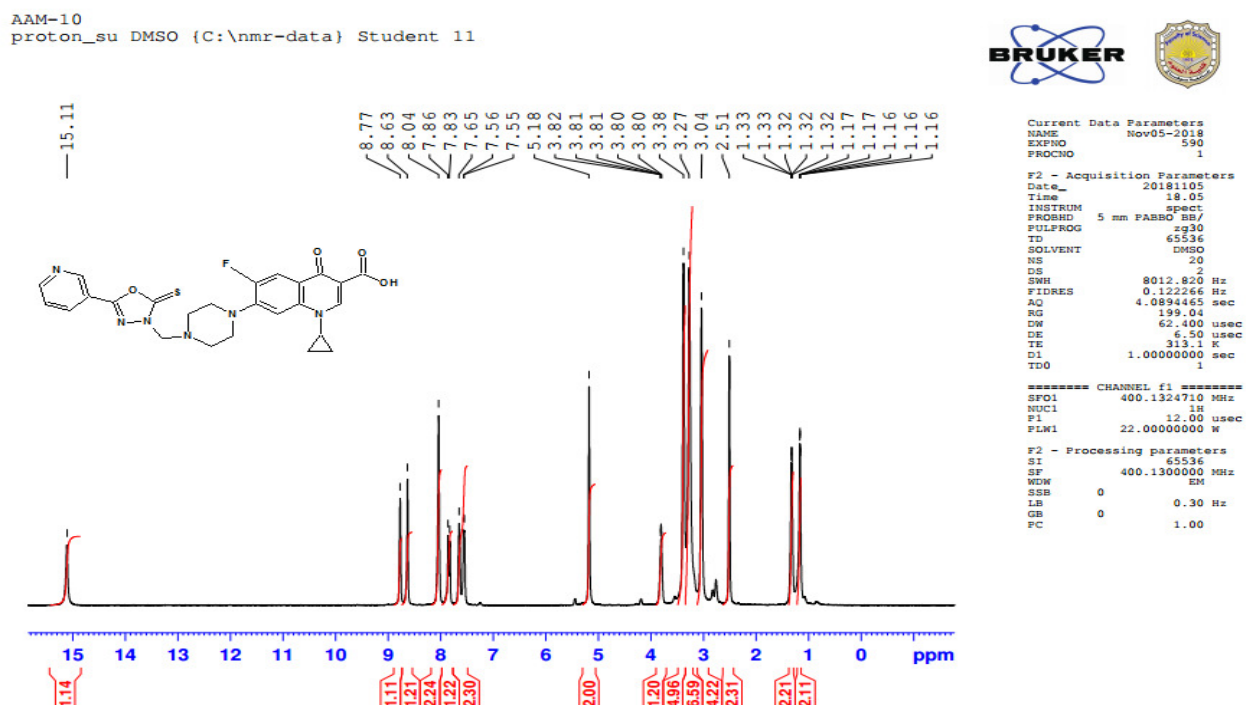



AAM-10  
proton\_su DMSO (C:\nmr-data) Student 11

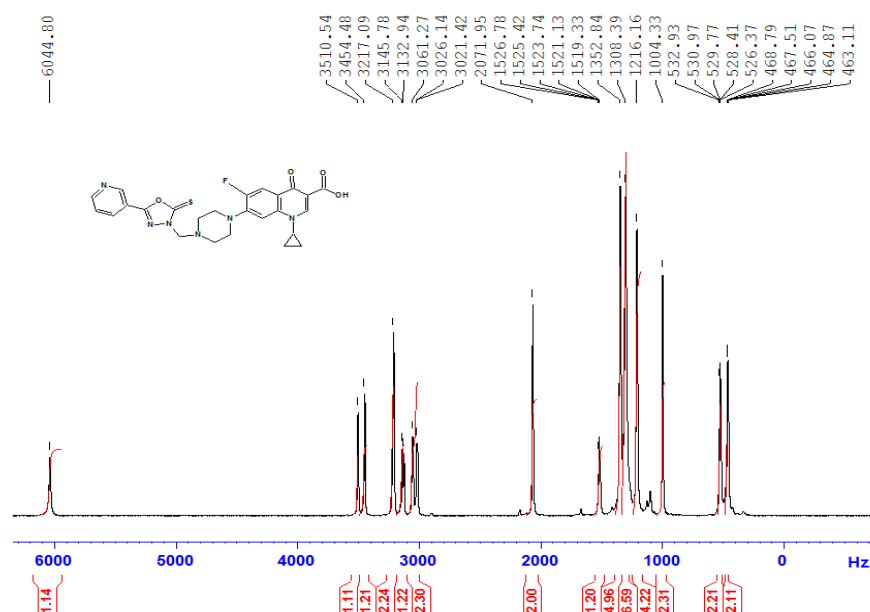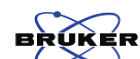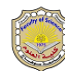

Current Data Parameters  
NAME Nov05-2018  
EXPNO 590  
PROCNO 1

F2 - Acquisition Parameters  
Date\_ 20181105  
Time 18.05  
INSTRUM spect  
PROBHD 5 mm PABBO BB/  
PULPROG zg30  
TD 65536  
SOLVENT DMSO  
NS 20  
DS 2  
SWH 8012.820 Hz  
FIDRES 0.122266 Hz  
AQ 4.0894465 sec  
RG 199.04  
DM 62.400 usec  
DE 6.50 usec  
TE 313.1 K  
D1 1.00000000 sec  
TD0 1

===== CHANNEL f1 =====  
SFO1 400.1324710 MHz  
NUC1 1H  
P1 12.00 usec  
PLW1 22.00000000 W

F2 - Processing parameters  
SI 65536  
SF 400.1300000 MHz  
WDW EM  
SSB 0  
LB 0.90 Hz  
GB 0  
PC 1.00

AAM-10  
c13\_su DMSO (C:\nmr-data) Student 2

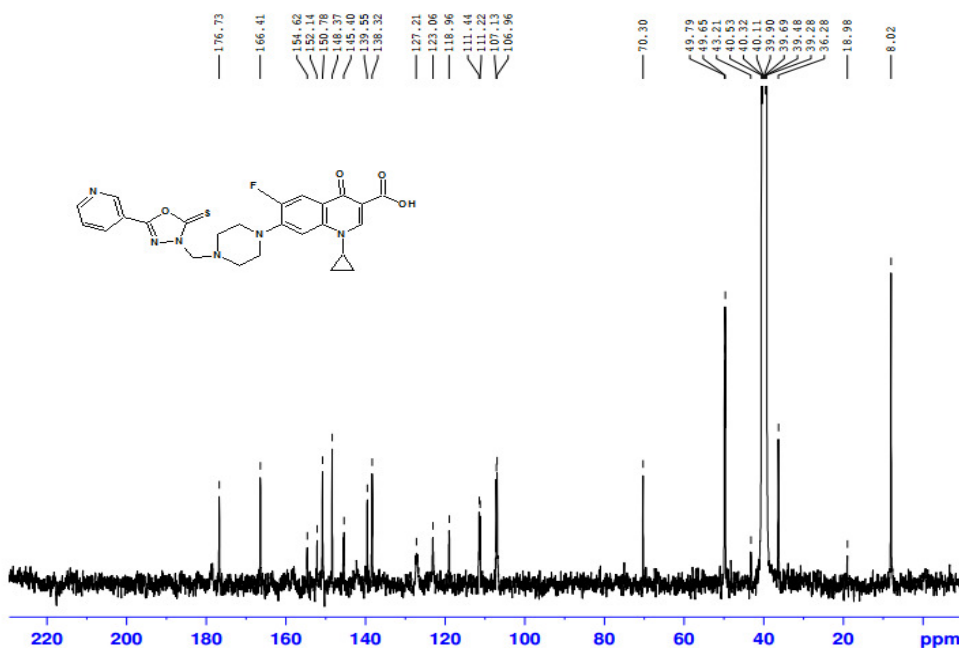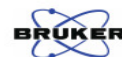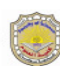

Current Data Parameters  
NAME Nov26-2018  
EXPNO 290  
PROCNO 1

F2 - Acquisition Parameters  
Date\_ 20181126  
Time 15.49  
INSTRUM spect  
PROBHD 5 mm PABBO BB/  
PULPROG zgpg30  
TD 65536  
SOLVENT DMSO  
NS 1100  
DS 4  
SWH 24038.461 Hz  
FIDRES 0.366798 Hz  
AQ 1.3631488 sec  
RG 158.76  
DM 20.800 usec  
DE 6.50 usec  
TE 298.1 K  
D1 2.00000000 sec  
D11 0.03000000 sec  
TD0 1

===== CHANNEL f1 =====  
SFO1 100.6238364 MHz  
NUC1 13C  
P1 9.50 usec  
PLW1 56.00000000 W

===== CHANNEL f2 =====  
SFO2 400.1316005 MHz  
NUC2 1H  
PCPDPRG2 waltz16  
PCPD2 90.00 usec  
PLW2 22.00000000 W  
PLW12 0.41091001 W  
PLW13 0.33284000 W

F2 - Processing parameters  
SI 32768  
SF 100.6127690 MHz  
WDW EM  
SSB 0  
LB 6.00 Hz  
GB 0  
PC 1.40

# S6- $^1\text{H}$ , $^{13}\text{C}$ NMR and dept-135 Spectra of 6

AAM-6  
proton\_su DMSO {C:\nmr-data} Student 17

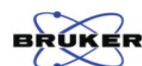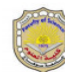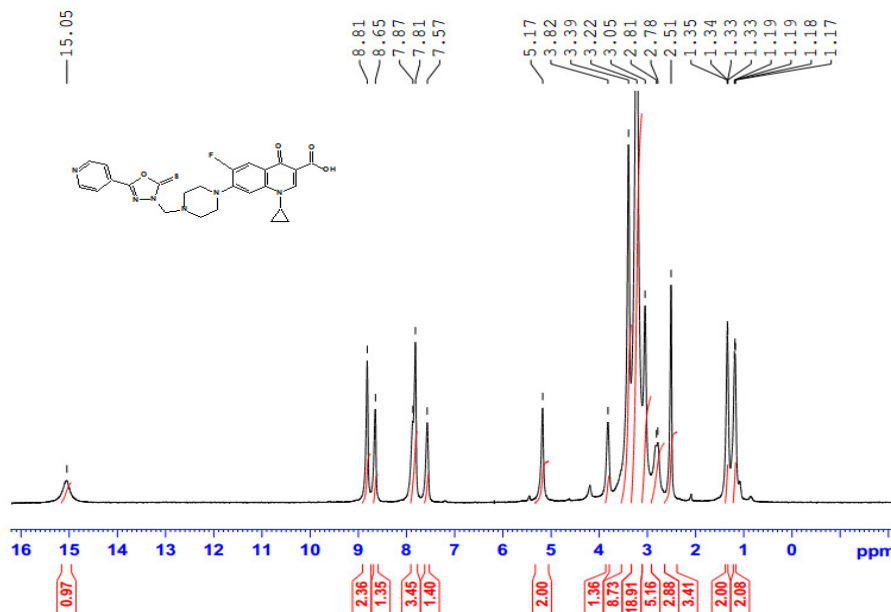

Current Data Parameters  
NAME Jan27-2019  
EXPNO 30  
PROCNO 1

F2 - Acquisition Parameters  
Date\_ 20190127  
Time 13.04  
INSTRUM spect  
PROBHD 5 mm PABBO BB/  
PULPROG zg30  
TD 65536  
SOLVENT DMSO  
NS 30  
DS 2  
SWH 8012.820 Hz  
FIDRES 0.122266 Hz  
AQ 4.0894465 sec  
RG 199.04  
DW 62.400 usec  
DE 6.50 usec  
TE 328.1 K  
D1 1.00000000 sec  
TD0 1

----- CHANNEL f1 -----  
SFO1 400.1324710 MHz  
NUC1 1H  
P1 12.00 usec  
PLW1 22.00000000 W

F2 - Processing parameters  
SI 65536  
SF 400.1300000 MHz  
WDW EM  
SSB 0  
LB 0.30 Hz  
GB 0  
PC 1.00

AAM-6  
proton\_su DMSO {C:\nmr-data} Student 17

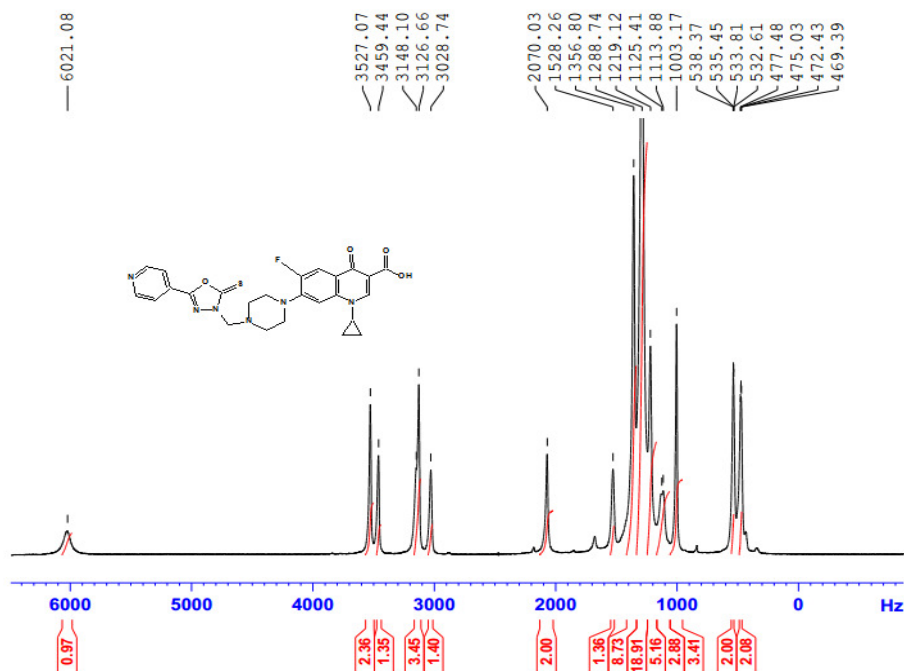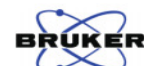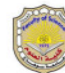

Current Data Parameters  
NAME Jan27-2019  
EXPNO 30  
PROCNO 1

F2 - Acquisition Parameters  
Date\_ 20190127  
Time 13.04  
INSTRUM spect  
PROBHD 5 mm PABBO BB/  
PULPROG zg30  
TD 65536  
SOLVENT DMSO  
NS 30  
DS 2  
SWH 8012.820 Hz  
FIDRES 0.122266 Hz  
AQ 4.0894465 sec  
RG 199.04  
DW 62.400 usec  
DE 6.50 usec  
TE 328.1 K  
D1 1.00000000 sec  
TD0 1

----- CHANNEL f1 -----  
SFO1 400.1324710 MHz  
NUC1 1H  
P1 12.00 usec  
PLW1 22.00000000 W

F2 - Processing parameters  
SI 65536  
SF 400.1300000 MHz  
WDW EM  
SSB 0  
LB 0.30 Hz  
GB 0  
PC 1.00

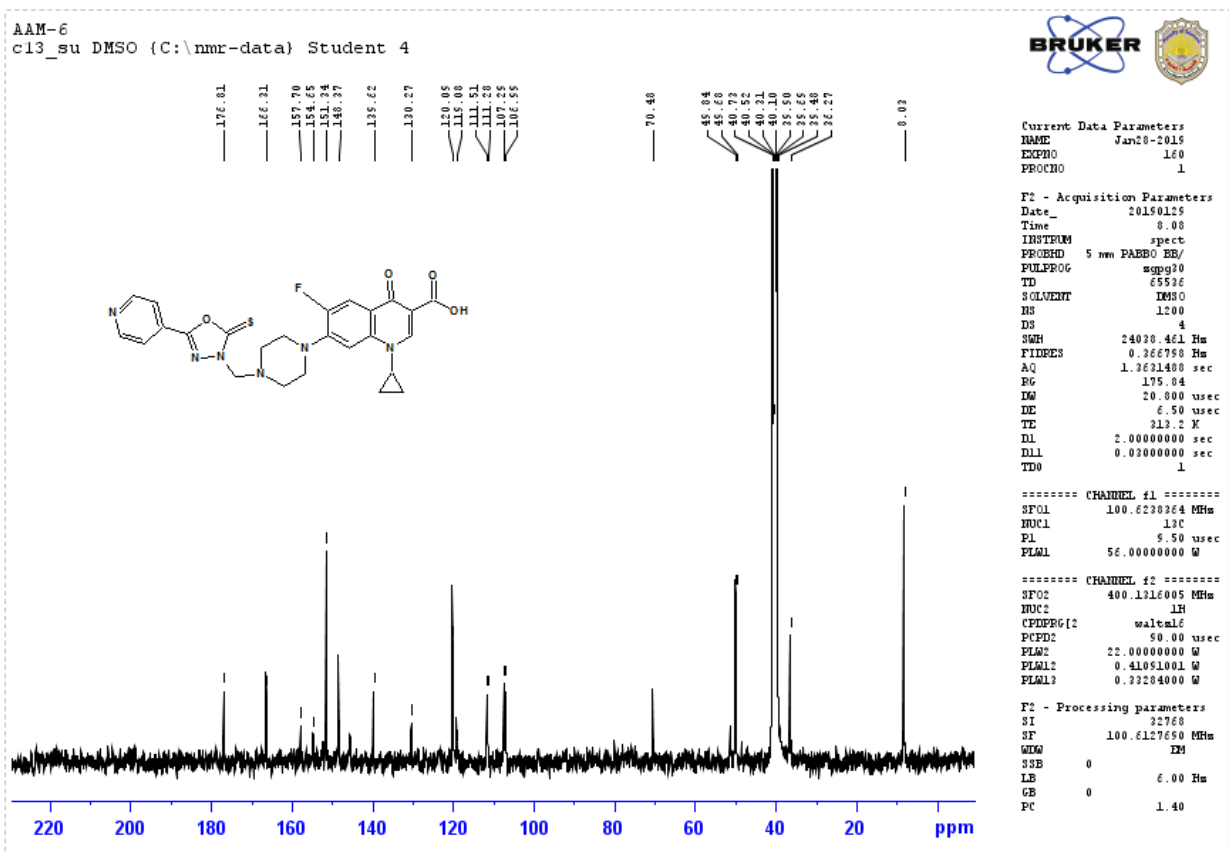

## S7- $^1\text{H}$ , $^{13}\text{C}$ NMR and dept-135 Spectra of 7

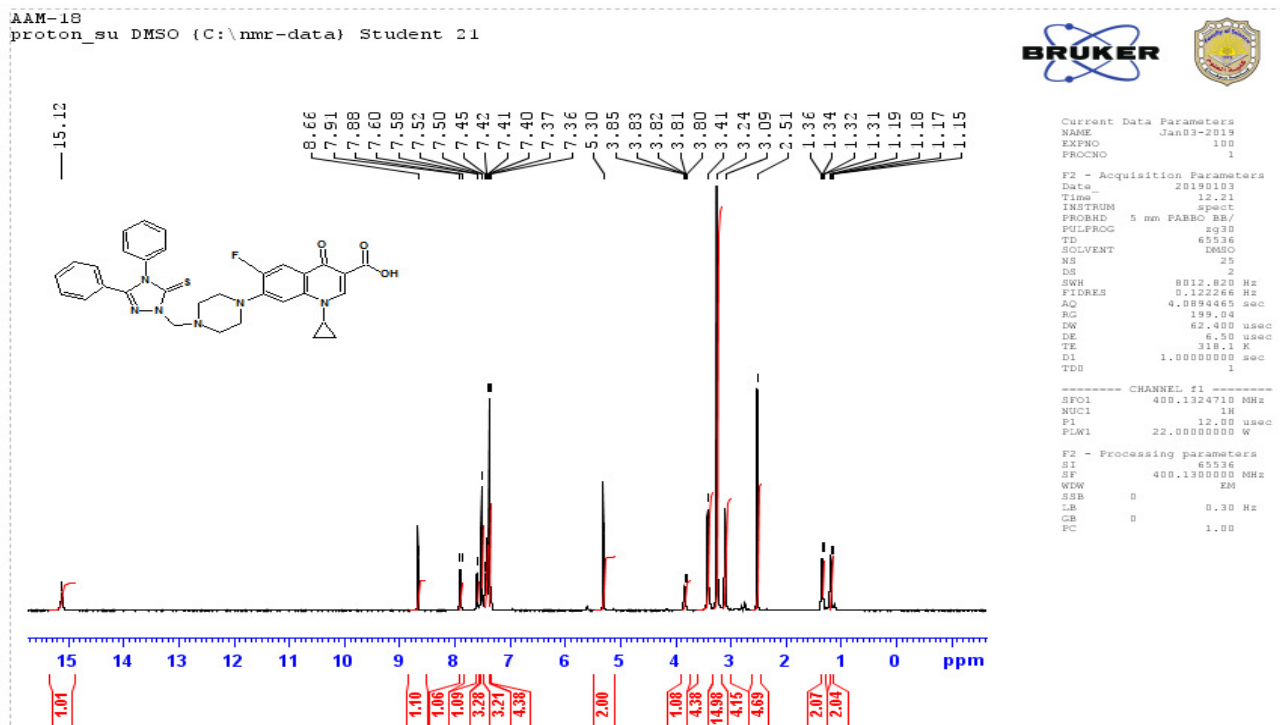

AAM-18  
proton\_su DMSO {C:\nmr-data} Student 21

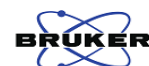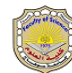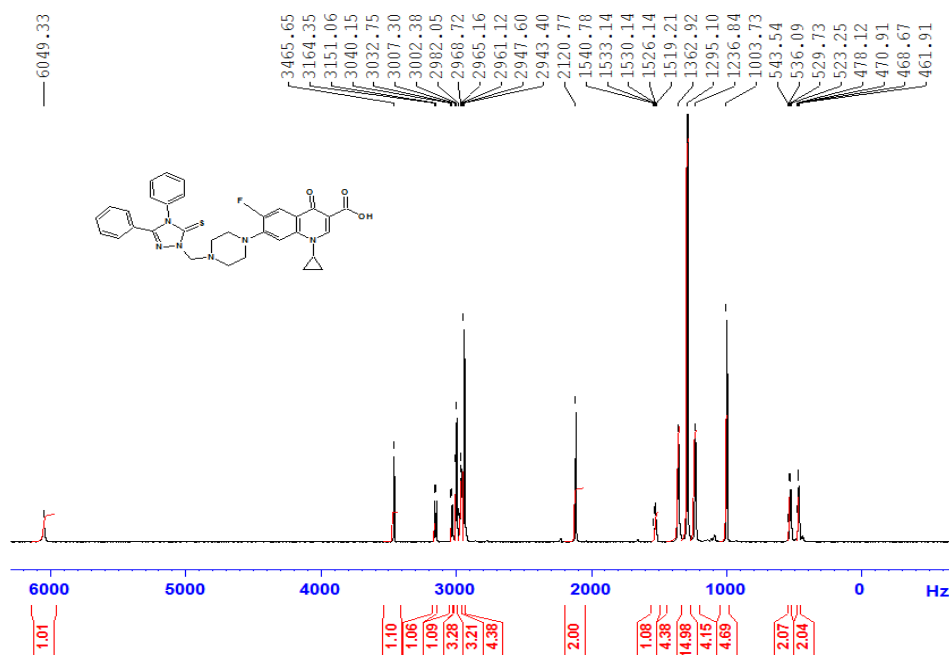

Current Data Parameters  
NAME Jan03-2019  
EXPNO 100  
PROCNO 1

F2 - Acquisition Parameters  
Date 20190103  
Time 12.21  
INSTRUM spect  
PROBHD 5 mm PABBO BB/  
PULPROG zg30  
TD 65536  
SOLVENT DMSO  
NS 25  
DS 2  
SWH 8012.820 Hz  
FIDRES 0.122266 Hz  
AQ 4.0894465 sec  
RG 199.04  
DW 62.400 usec  
DE 6.50 usec  
TE 318.1 K  
D1 1.00000000 sec  
TDO 1

CHANNEL f1  
SFO1 400.1324710 MHz  
NUC1 1H  
P1 12.00 usec  
PLW1 22.00000000 W

F2 - Processing parameters  
SI 65536  
SF 400.1300000 MHz  
WDW EM  
SSB 0  
LB 0.30 Hz  
GB 0  
PC 1.00

AAM-18  
c13\_su DMSO {C:\nmr-data} Student 24

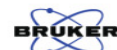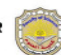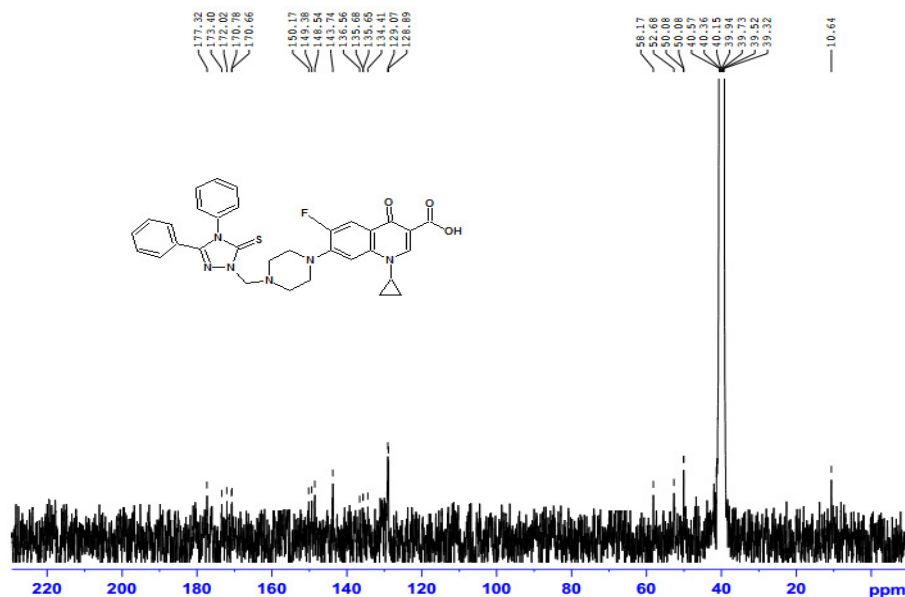

Current Data Parameters  
NAME Jan15-2019  
EXPNO 50  
PROCNO 1

F2 - Acquisition Parameters  
Date 20190116  
Time 10.10  
INSTRUM spect  
PROBHD 5 mm PABBO BB/  
PULPROG zgpg30  
TD 65536  
SOLVENT DMSO  
NS 1200  
DS 4  
SWH 24038.461 Hz  
FIDRES 0.366798 Hz  
AQ 1.3631488 sec  
RG 100.43  
DW 20.800 usec  
DE 6.50 usec  
TE 294.6 K  
D1 2.00000000 sec  
D11 0.03000000 sec  
TDO 1

CHANNEL f1  
SFO1 100.6238364 MHz  
NUC1 13C  
P1 9.50 usec  
PLW1 56.00000000 W

CHANNEL f2  
SFO2 400.1316005 MHz  
NUC2 1H  
PCPD2 waltz16  
PCPD2 90.00 usec  
PLW2 22.00000000 W  
PLW12 0.41091001 W  
PLW13 0.33284000 W

F2 - Processing parameters  
SI 32768  
SF 100.6127690 MHz  
WDW EM  
SSB 0  
LB 6.00 Hz  
GB 0  
PC 1.40

# S8- $^1\text{H}$ , $^{13}\text{C}$ NMR and dept-135 Spectra of 8

AAM-20  
proton\_su DMSO {C:\nmr-data} Student 17

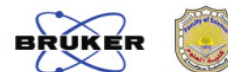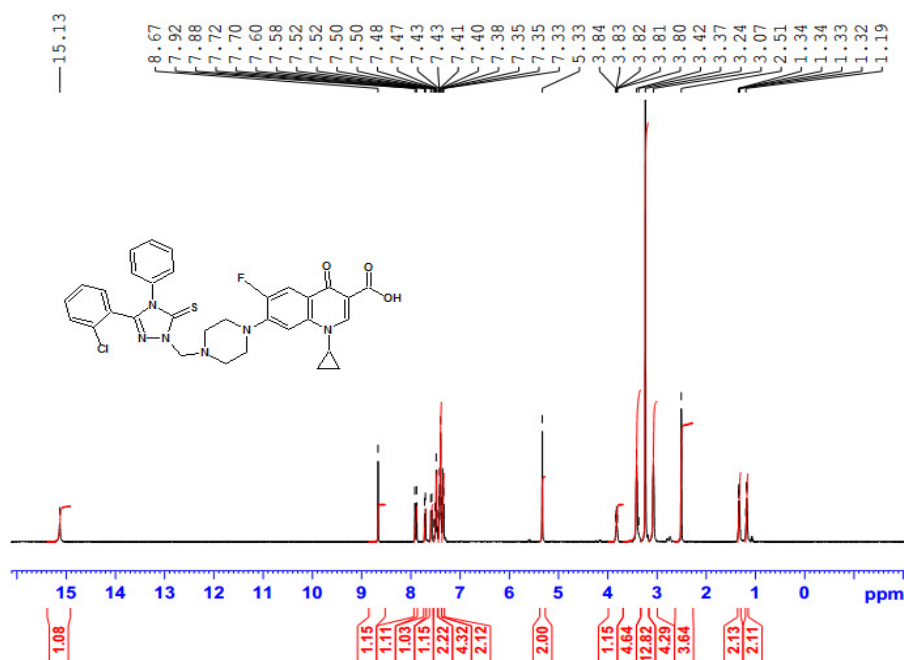

Current Data Parameters  
NAME Jan03-2019  
EXPNO 60  
PROCNO 1

F2 - Acquisition Parameters  
Date\_ 20190103  
Time 11.58  
INSTRUM spect  
PROBHD 5 mm PABBO BB/  
PULPROG zg30  
TD 65536  
SOLVENT DMSO  
NS 25  
DS 2  
SWH 8012.820 Hz  
FIDRES 0.122266 Hz  
AQ 4.0894465 sec  
RG 199.04  
DW 62.400 usec  
DE 6.50 usec  
TE 318.2 K  
D1 1.00000000 sec  
TDO 1

===== CHANNEL f1 =====  
SFO1 400.1324710 MHz  
NUC1 1H  
P1 12.00 usec  
PLW1 22.00000000 W

F2 - Processing parameters  
SI 65536  
SF 400.1300000 MHz  
WDW EM  
SSB 0  
LB 0.30 Hz  
GB 0  
PC 1.00

AAM-20  
proton\_su DMSO {C:\nmr-data} Student 17

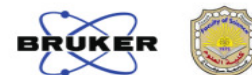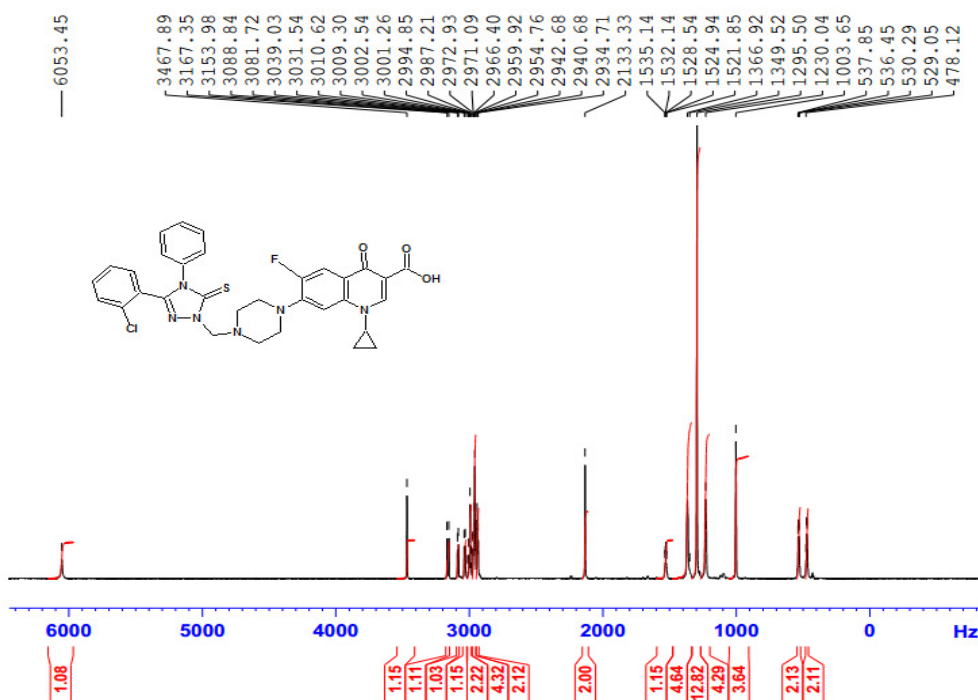

Current Data Parameters  
NAME Jan03-2019  
EXPNO 60  
PROCNO 1

F2 - Acquisition Parameters  
Date\_ 20190103  
Time 11.58  
INSTRUM spect  
PROBHD 5 mm PABBO BB/  
PULPROG zg30  
TD 65536  
SOLVENT DMSO  
NS 25  
DS 2  
SWH 8012.820 Hz  
FIDRES 0.122266 Hz  
AQ 4.0894465 sec  
RG 199.04  
DW 62.400 usec  
DE 6.50 usec  
TE 318.2 K  
D1 1.00000000 sec  
TDO 1

===== CHANNEL f1 =====  
SFO1 400.1324710 MHz  
NUC1 1H  
P1 12.00 usec  
PLW1 22.00000000 W

F2 - Processing parameters  
SI 65536  
SF 400.1300000 MHz  
WDW EM  
SSB 0  
LB 0.30 Hz  
GB 0  
PC 1.00



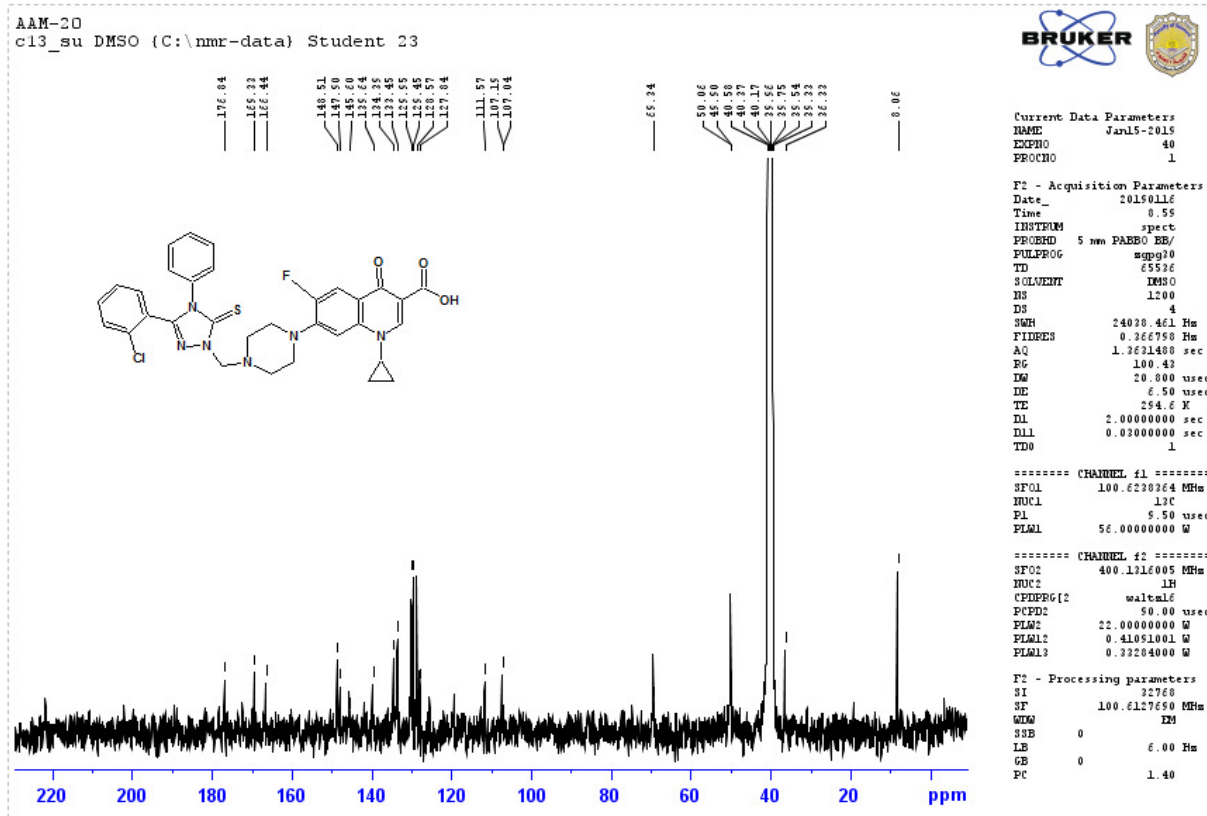

## S9- $^1\text{H}$ , $^{13}\text{C}$ NMR and dept-135 Spectra of 9

AAM-21  
proton\_su DMSO (C:\nmr-data) Student 12

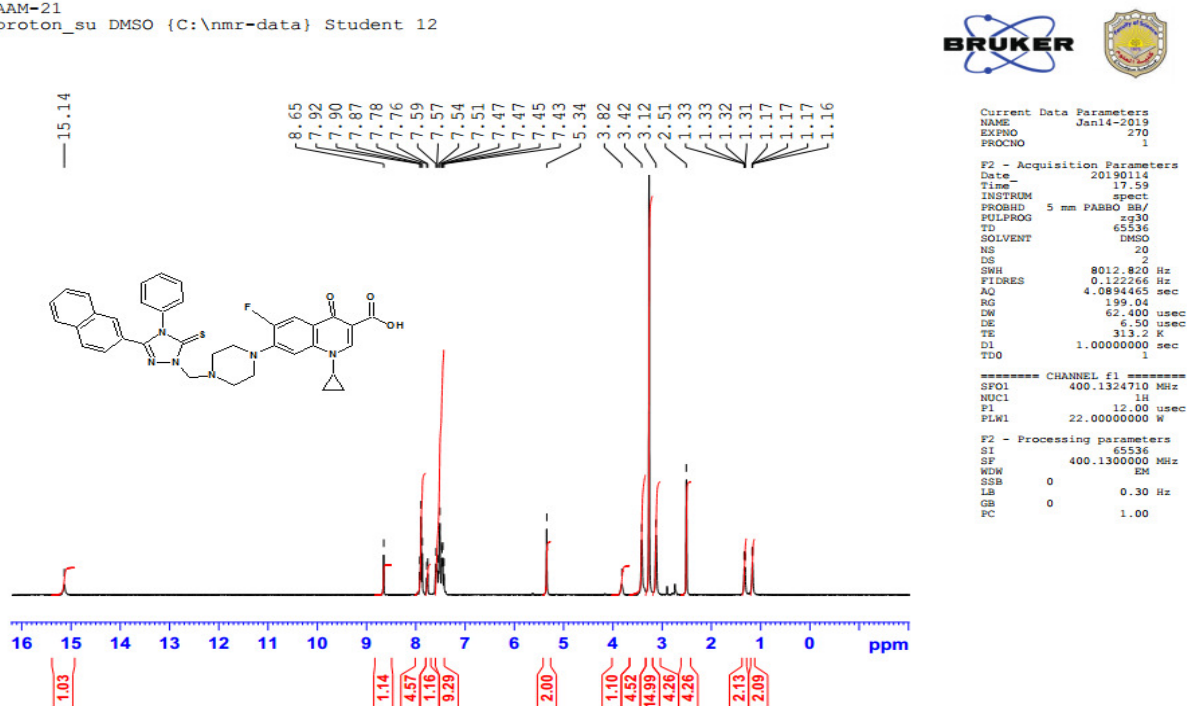

AAM-21  
proton\_su DMSO {C:\nmr-data} Student 12

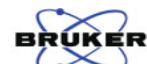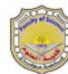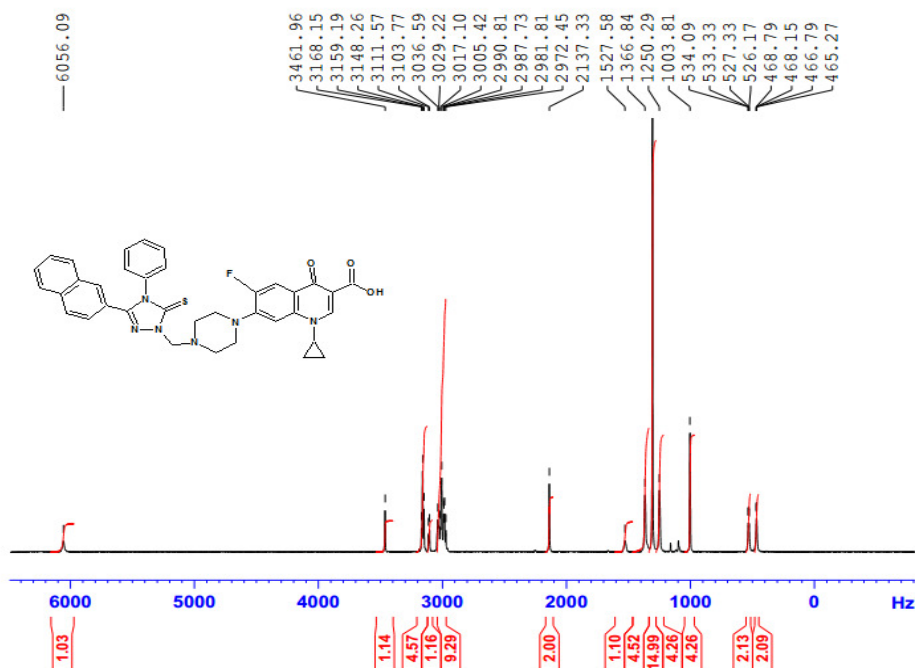

Current Data Parameters  
NAME Jan14-2019  
EXPNO 270  
PROCNO 1

F2 - Acquisition Parameters  
Date\_ 20190114  
Time 17.59  
INSTRUM spect  
PROBHD 5 mm PABBO BB/  
PULPROG zg30  
TD 65536  
SOLVENT DMSO  
NS 2  
DS 2  
SWH 8012.820 Hz  
FIDRES 0.122266 Hz  
AQ 4.0894465 sec  
RG 199.04  
DW 62.400 usec  
DE 6.50 usec  
TE 313.2 K  
D1 1.00000000 sec  
TDO 1

===== CHANNEL f1 =====  
SFO1 400.1324710 MHz  
NUC1 1H  
P1 12.00 usec  
PLW1 22.00000000 W

F2 - Processing parameters  
SI 65536  
SF 400.1300000 MHz  
WDW EM  
SSB 0  
LB 0.30 Hz  
GB 0  
PC 1.00

AAM-21  
c13\_su DMSO {C:\nmr-data} Student 24

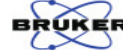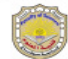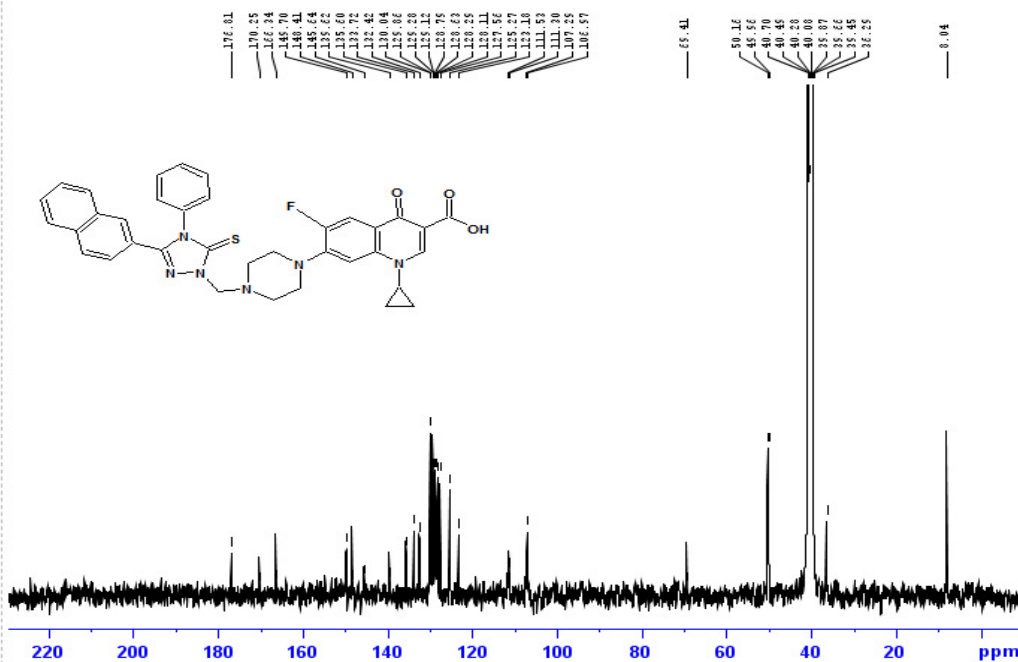

Current Data Parameters  
NAME Jan15-2019  
EXPNO 430  
PROCNO 1

F2 - Acquisition Parameters  
Date\_ 20190120  
Time 1.22  
INSTRUM spect  
PROBHD 5 mm PABBO BB/  
PULPROG zgpg30  
TD 65536  
SOLVENT DMSO  
NS 1280  
DS 4  
SWH 24020.461 Hz  
FIDRES 0.266750 Hz  
AQ 1.3611400 sec  
RG 175.04  
DW 20.000 usec  
DE 6.50 usec  
TE 300.1 K  
D1 2.00000000 sec  
D11 0.02000000 sec  
TDO 1

===== CHANNEL f1 =====  
SFO1 100.6238264 MHz  
NUC1 13C  
P1 5.50 usec  
PLW1 56.00000000 W

===== CHANNEL f2 =====  
SFO2 400.1316005 MHz  
NUC2 1H  
PCPD2 waltz16  
PCPD2 50.00 usec  
PLW2 22.00000000 W  
PLW12 0.41951001 W  
PLW13 0.32254000 W

F2 - Processing parameters  
SI 32768  
SF 100.6127650 MHz  
WDW EM  
SSB 0  
LB 6.00 Hz  
GB 0  
PC 1.40



# S10- $^1\text{H}$ , $^{13}\text{C}$ NMR and dept-135 Spectra of 10

AAM-7  
proton\_su DMSO (C:\nmr-data) Student 21

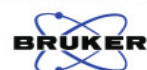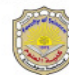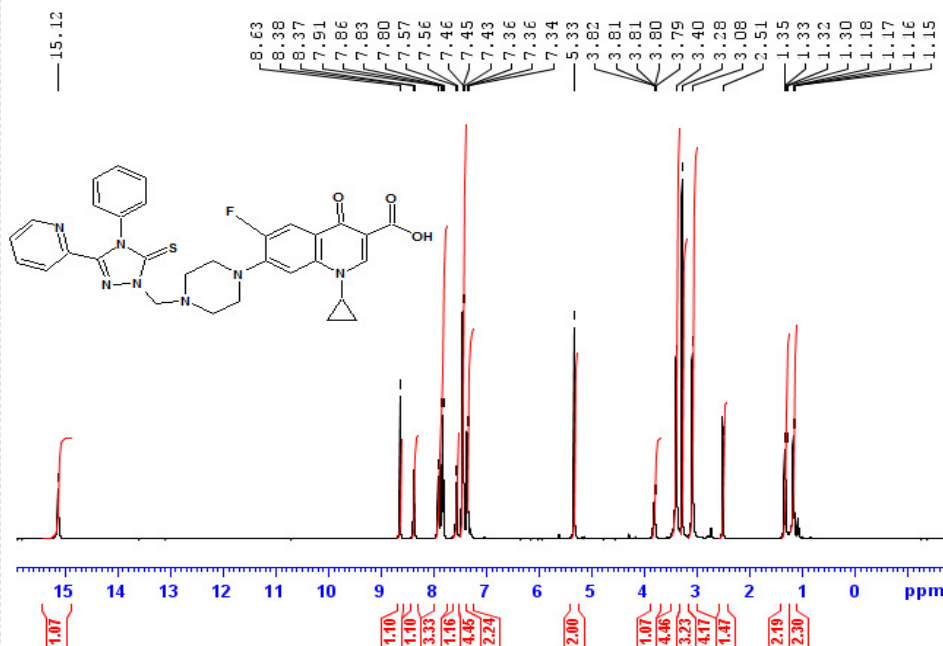

Current Data Parameters  
NAME Sep29-2018  
EXPNO 40  
PROCNO 1

F2 - Acquisition Parameters  
Date\_ 20180929  
Time 12.09  
INSTRUM spect  
PROCBD 5 mm PABBO BB/  
PULPROG zg30  
TD 65536  
SOLVENT DMSO  
NS 20  
DS 2  
SWH 8012.820 Hz  
FIDRES 0.122266 Hz  
AQ 4.0894465 sec  
RG 135  
DW 62.400 usec  
DE 6.50 usec  
TE 310.1 K  
D1 1.00000000 sec  
TDO 1

----- CHANNEL f1 -----  
SFO1 400.1324710 MHz  
NUC1 1H  
P1 12.00 usec  
PLW1 22.00000000 W

F2 - Processing parameters  
SI 65536  
SF 400.1300000 MHz  
WDW EM  
SSB 0  
LB 0.30 Hz  
GB 0  
PC 1.00

AAM-7  
proton\_su DMSO (C:\nmr-data) Student 21

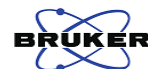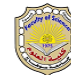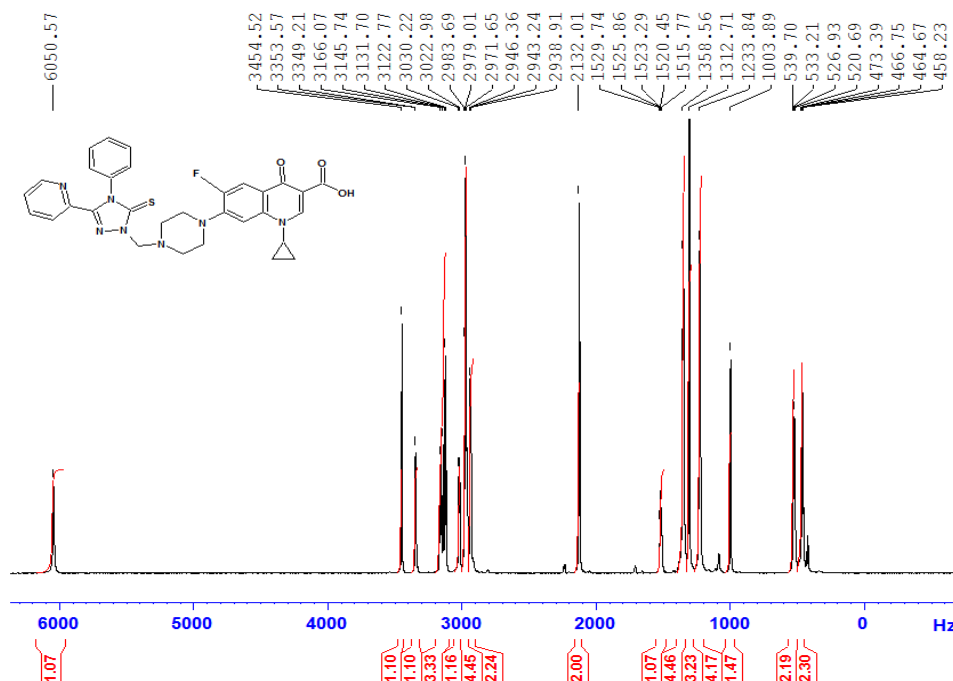

Current Data Parameters  
NAME Sep29-2018  
EXPNO 40  
PROCNO 1

F2 - Acquisition Parameters  
Date\_ 20180929  
Time 12.09  
INSTRUM spect  
PROCBD 5 mm PABBO BB/  
PULPROG zg30  
TD 65536  
SOLVENT DMSO  
NS 20  
DS 2  
SWH 8012.820 Hz  
FIDRES 0.122266 Hz  
AQ 4.0894465 sec  
RG 135  
DW 62.400 usec  
DE 6.50 usec  
TE 310.1 K  
D1 1.00000000 sec  
TDO 1

----- CHANNEL f1 -----  
SFO1 400.1324710 MHz  
NUC1 1H  
P1 12.00 usec  
PLW1 22.00000000 W

F2 - Processing parameters  
SI 65536  
SF 400.1300000 MHz  
WDW EM  
SSB 0  
LB 0.30 Hz  
GB 0  
PC 1.00

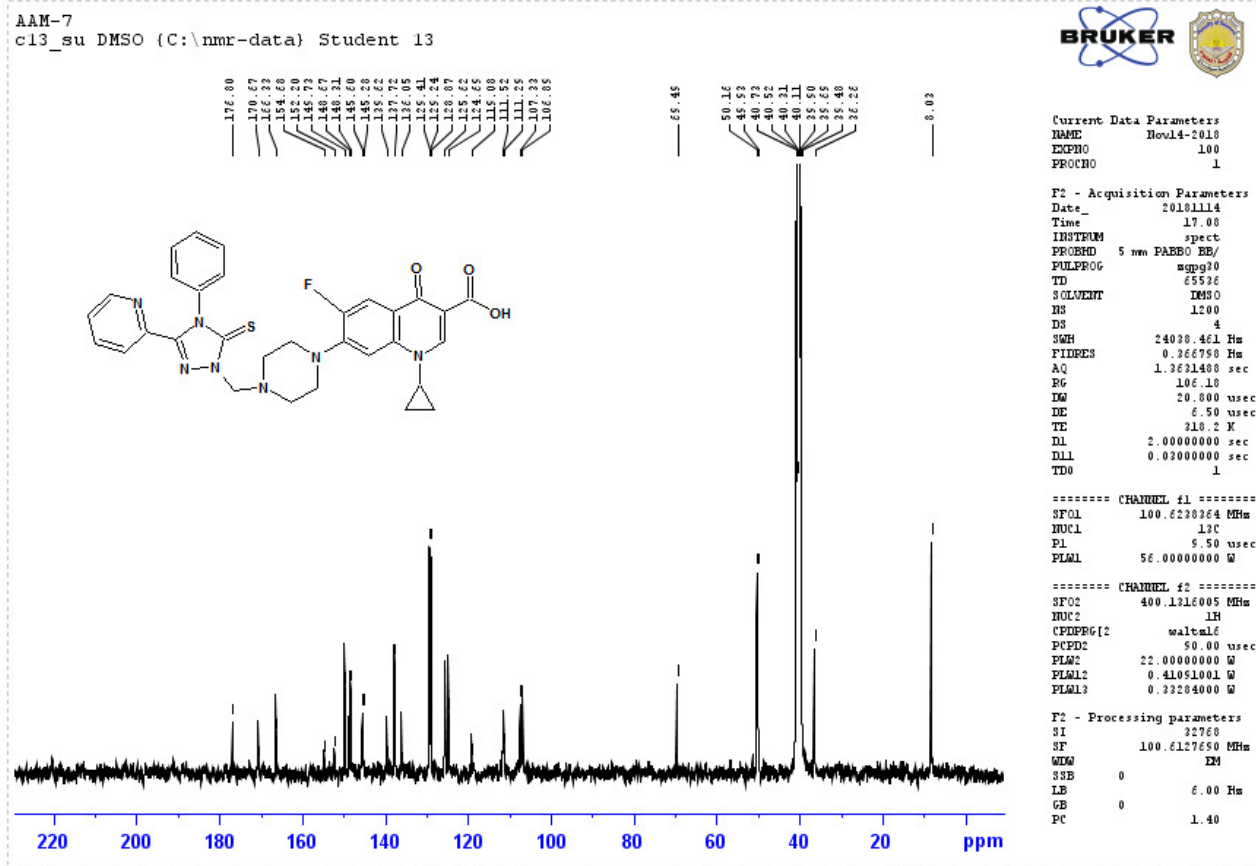

S11-<sup>1</sup>H, <sup>13</sup>C NMR and dept-135 Spectra of 11

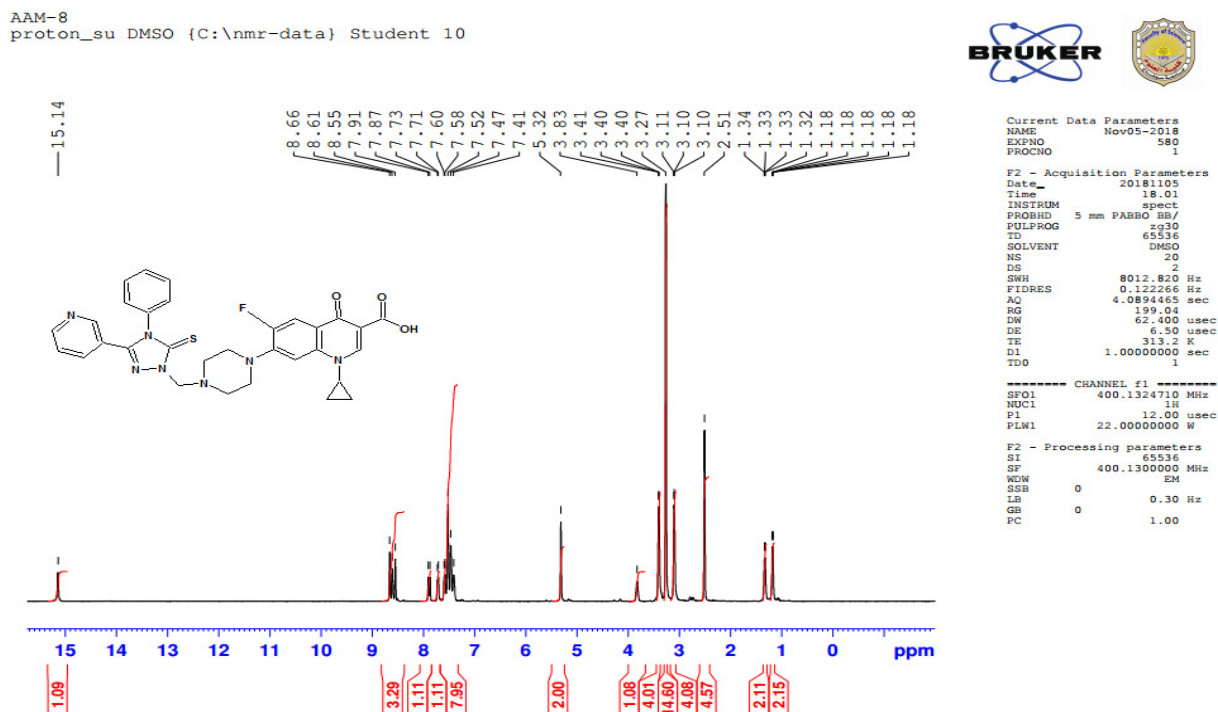

AAM-8  
proton\_su DMSO {C:\nmr-data} Student 10

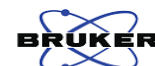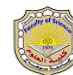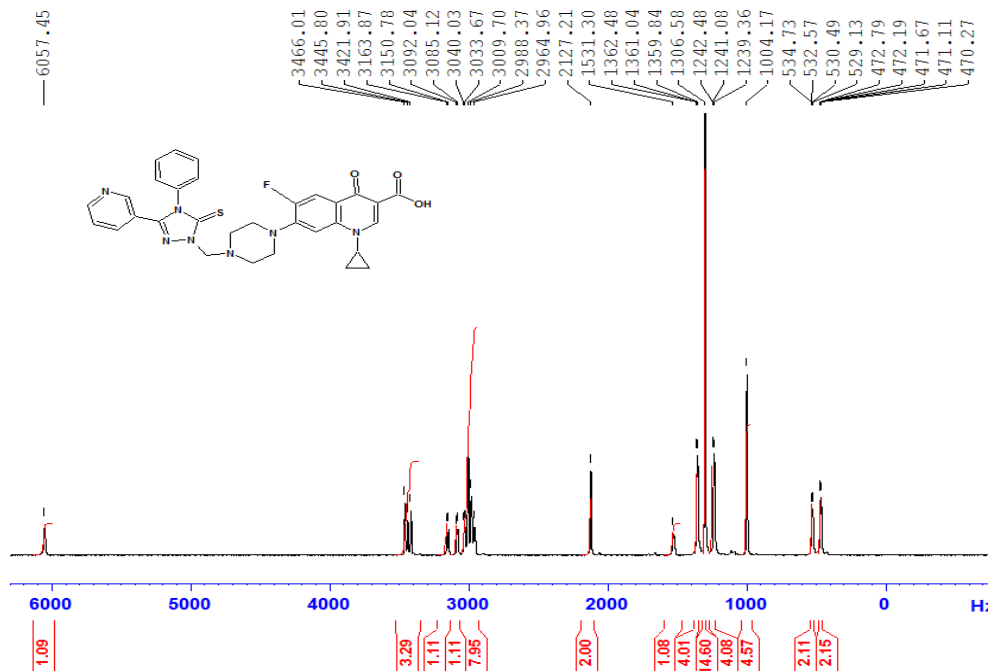

Current Data Parameters  
NAME Nov05-2018  
EXPNO 580  
PROCNO 1

F2 - Acquisition Parameters  
Date\_ 20181105  
Time 18.01  
INSTRUM spect  
PROBHD 5 mm PABBO BB/  
PULPROG zg30  
TD 65536  
SOLVENT DMSO  
NS 2  
DS 2  
SWH 8012.820 Hz  
FIDRES 0.122266 Hz  
AQ 4.0894466 sec  
RG 139.04  
DW 62.400 usec  
DE 6.50 usec  
TE 313.2 K  
D1 1.00000000 sec  
TD0 1

===== CHANNEL f1 =====  
SFO1 400.1324710 MHz  
NUC1 1H  
P1 12.00 usec  
PLW1 22.00000000 W

F2 - Processing parameters  
SI 65536  
SF 400.1300000 MHz  
WDW EM  
SSB 0  
LB 0.30 Hz  
GB 0  
PC 1.00

AAM-8  
c13\_su DMSO {C:\nmr-data} Student 1

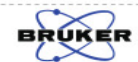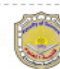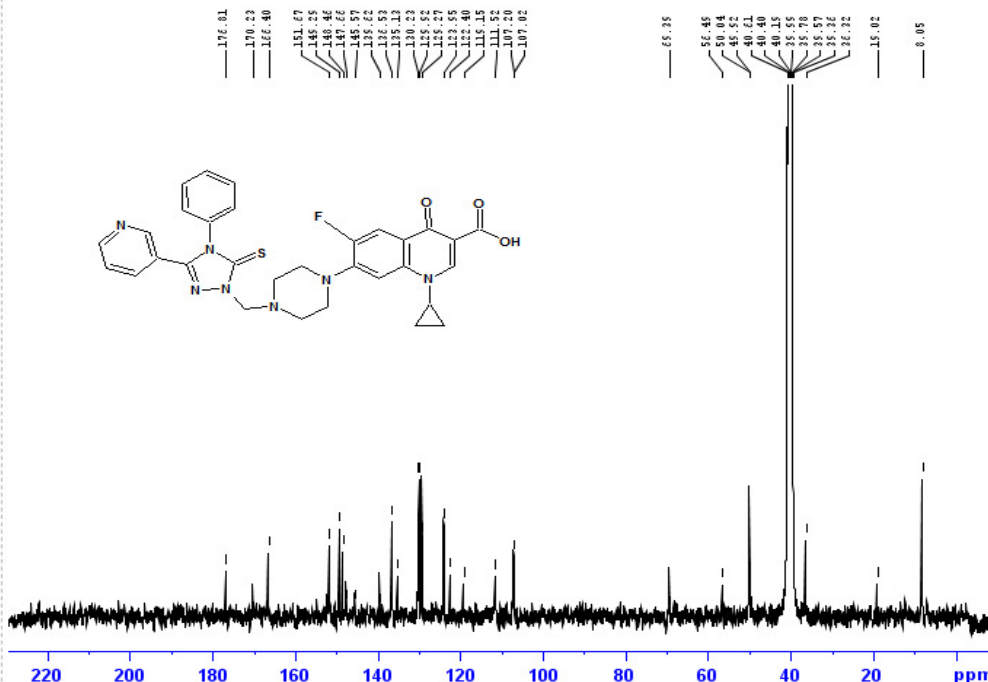

Current Data Parameters  
NAME Nov05-2018  
EXPNO 280  
PROCNO 1

F2 - Acquisition Parameters  
Date\_ 20181126  
Time 14.42  
INSTRUM spect  
PROBHD 5 mm PABBO BB/  
PULPROG zgpg30  
TD 65536  
SOLVENT DMSO  
NS 4  
DS 4  
SWH 24038.461 Hz  
FIDRES 0.266758 Hz  
AQ 1.3621400 sec  
RG 100.42  
DW 20.800 usec  
DE 6.50 usec  
TE 298.1 K  
D1 2.00000000 sec  
D11 0.03000000 sec  
TD0 1

===== CHANNEL f1 =====  
SFO1 100.6230264 MHz  
NUC1 13C  
P1 5.50 usec  
PLW1 56.00000000 W

===== CHANNEL f2 =====  
SFO2 400.1316005 MHz  
NUC2 1H  
PCPD2 waltz16  
PCPD2 50.00 usec  
PLW2 22.00000000 W  
PLW2 0.41051001 W  
PLW2 0.32284000 W

F2 - Processing parameters  
SI 22768  
SF 100.6127650 MHz  
WDW EM  
SSB 0  
LB 6.00 Hz  
GB 0  
PC 1.40

# S12- <sup>1</sup>H, <sup>13</sup>C NMR and dept-135 Spectra of 12

AAM-23  
proton\_su DMSO {C:\nmr-data} Student 21

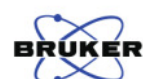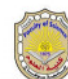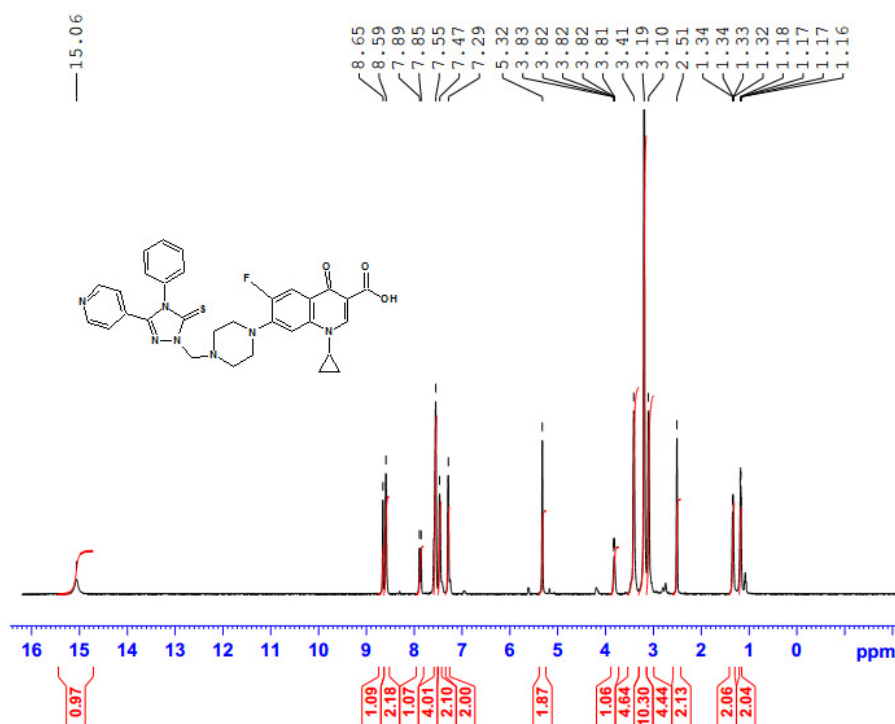

Current Data Parameters  
NAME Jan27-2019  
EXPNO 70  
PROCNO 1

F2 - Acquisition Parameters  
Date\_ 20190127  
Time 13.35  
INSTRUM spect  
PROBHD 5 mm PARBO BB/  
PULPROG zg30  
TD 65536  
SOLVENT DMSO  
NS 25  
DS 2  
SWH 8012.820 Hz  
FIDRES 0.122266 Hz  
AQ 4.0894465 sec  
RG 158.76  
DW 62.400 usec  
DE 6.50 usec  
TE 328.1 K  
D1 1.00000000 sec  
TD0 1

===== CHANNEL f1 =====  
SFO1 400.1324710 MHz  
NUC1 1H  
P1 12.00 usec  
PLW1 22.00000000 W

F2 - Processing parameters  
SI 65536  
SF 400.1300000 MHz  
WDW EM  
SSB 0  
LB 0.30 Hz  
GB 0  
PC 1.00

AAM-23  
proton\_su DMSO {C:\nmr-data} Student 21

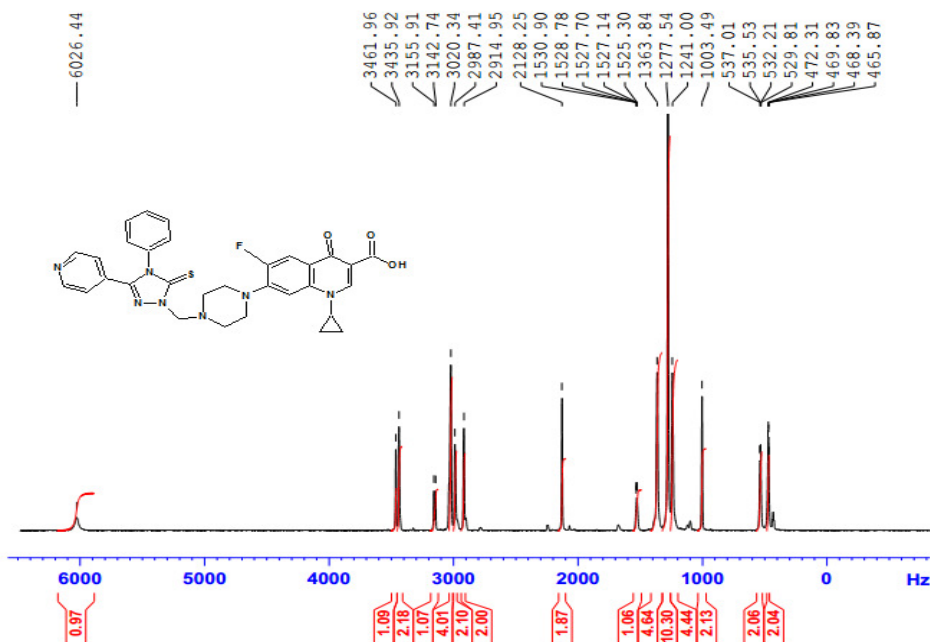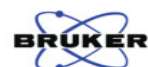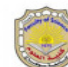

Current Data Parameters  
NAME Jan27-2019  
EXPNO 70  
PROCNO 1

F2 - Acquisition Parameters  
Date\_ 20190127  
Time 13.35  
INSTRUM spect  
PROBHD 5 mm PARBO BB/  
PULPROG zg30  
TD 65536  
SOLVENT DMSO  
NS 25  
DS 2  
SWH 8012.820 Hz  
FIDRES 0.122266 Hz  
AQ 4.0894465 sec  
RG 158.76  
DW 62.400 usec  
DE 6.50 usec  
TE 328.1 K  
D1 1.00000000 sec  
TD0 1

===== CHANNEL f1 =====  
SFO1 400.1324710 MHz  
NUC1 1H  
P1 12.00 usec  
PLW1 22.00000000 W

F2 - Processing parameters  
SI 65536  
SF 400.1300000 MHz  
WDW EM  
SSB 0  
LB 0.30 Hz  
GB 0  
PC 1.00

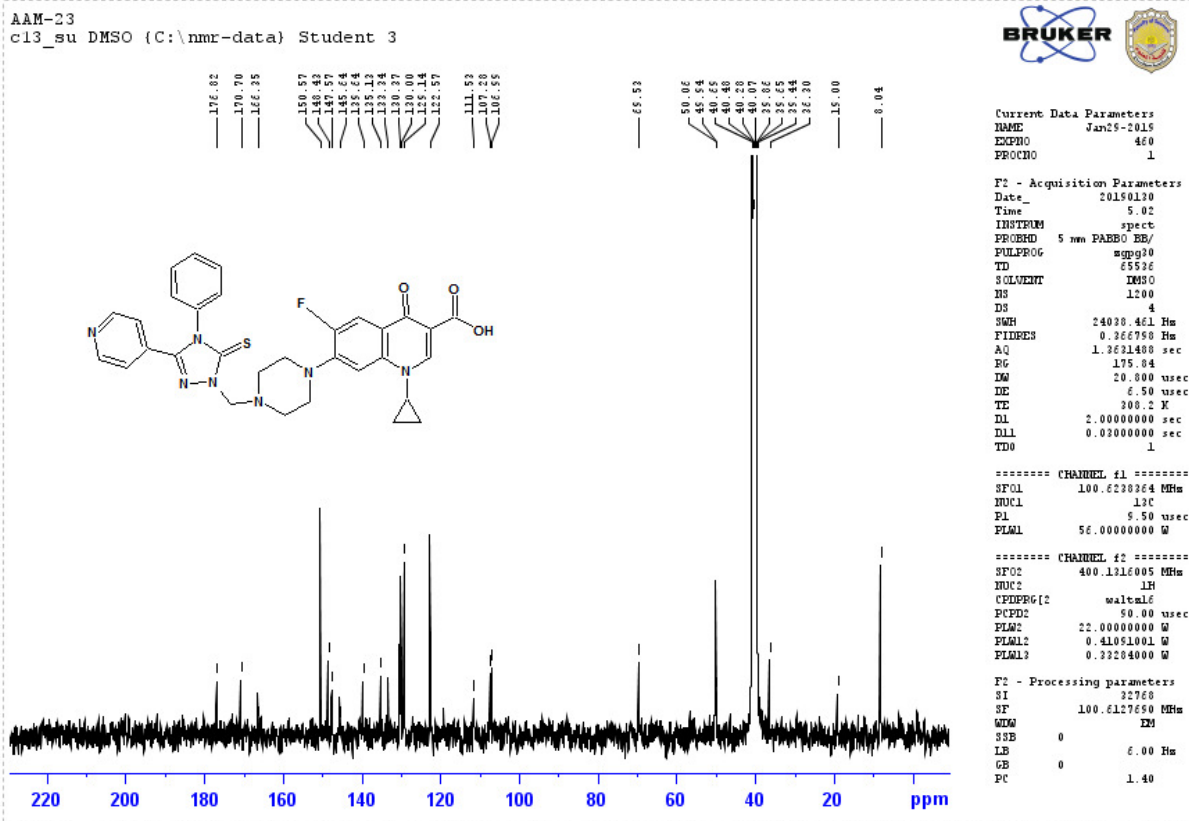

S13-  $^1\text{H}$ ,  $^{13}\text{C}$  NMR and dept-135 Spectra of 13

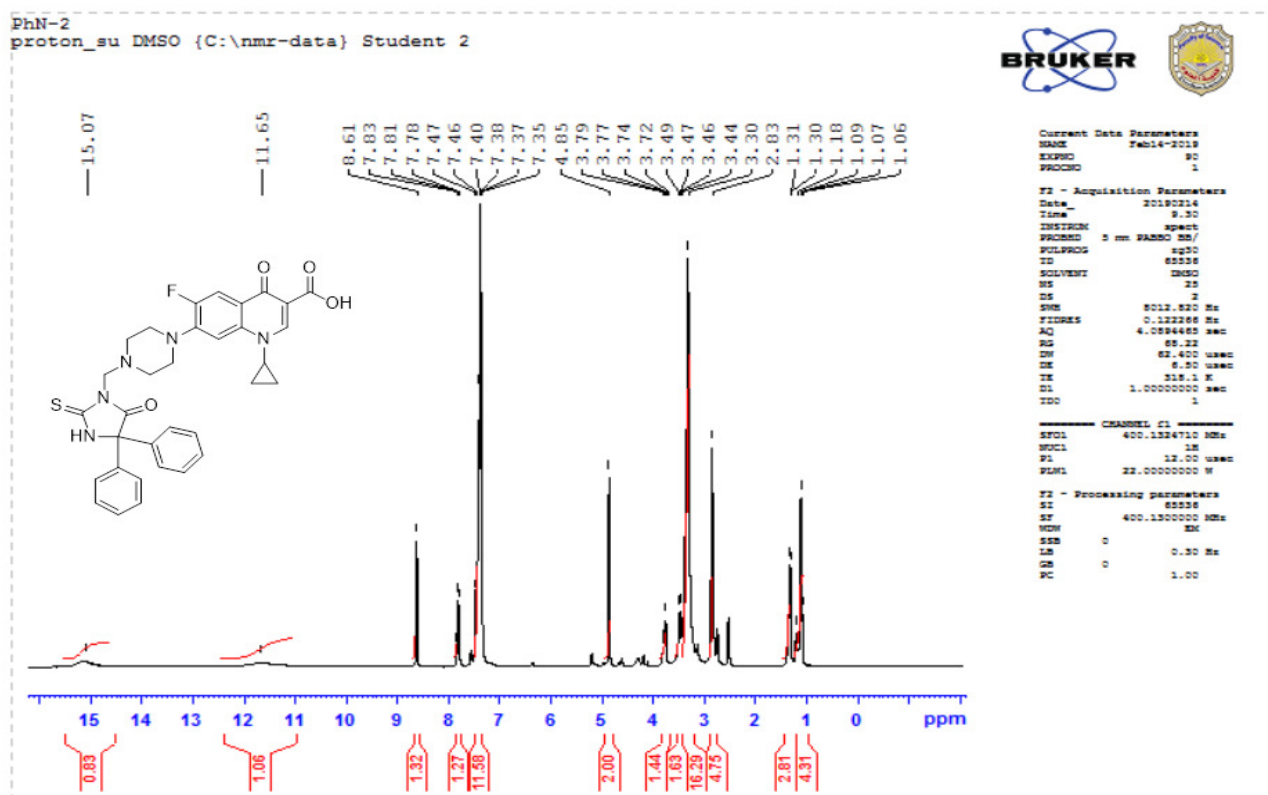



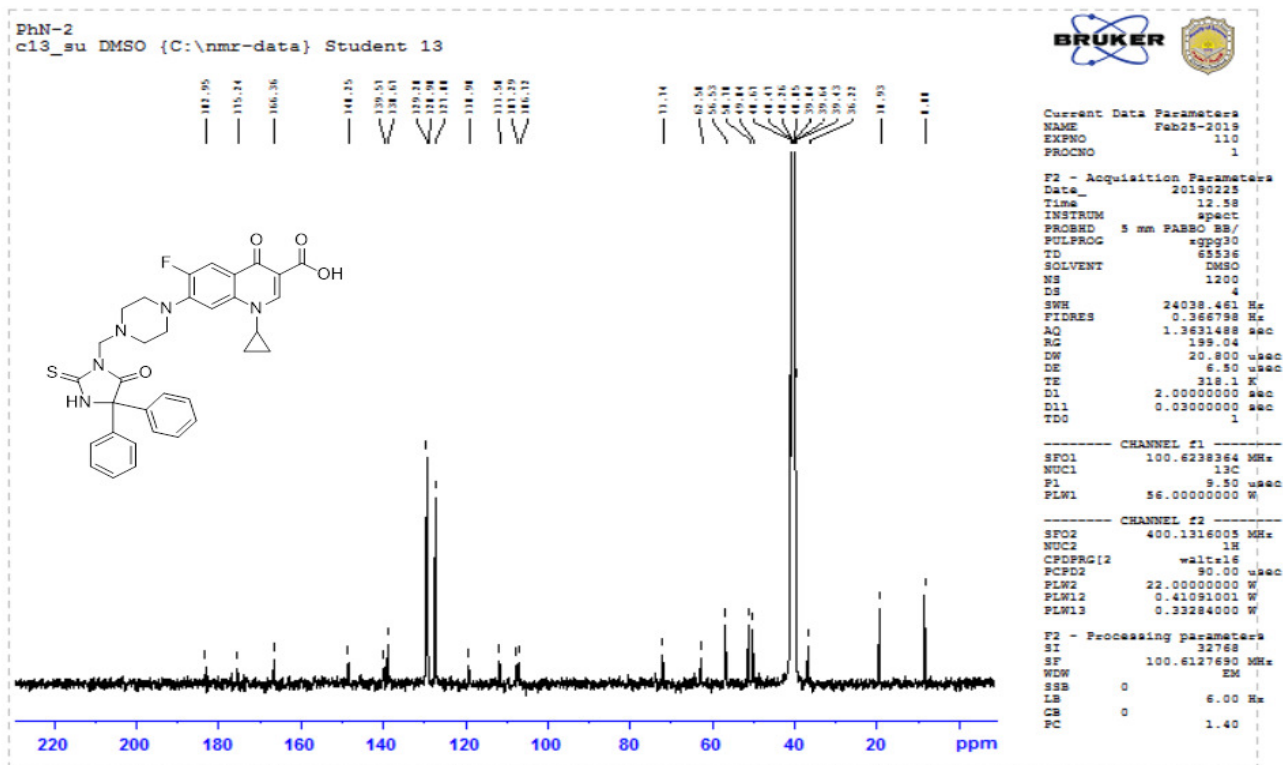

S14-  $^1\text{H}$ ,  $^{13}\text{C}$  NMR and dept-135 Spectra of 14

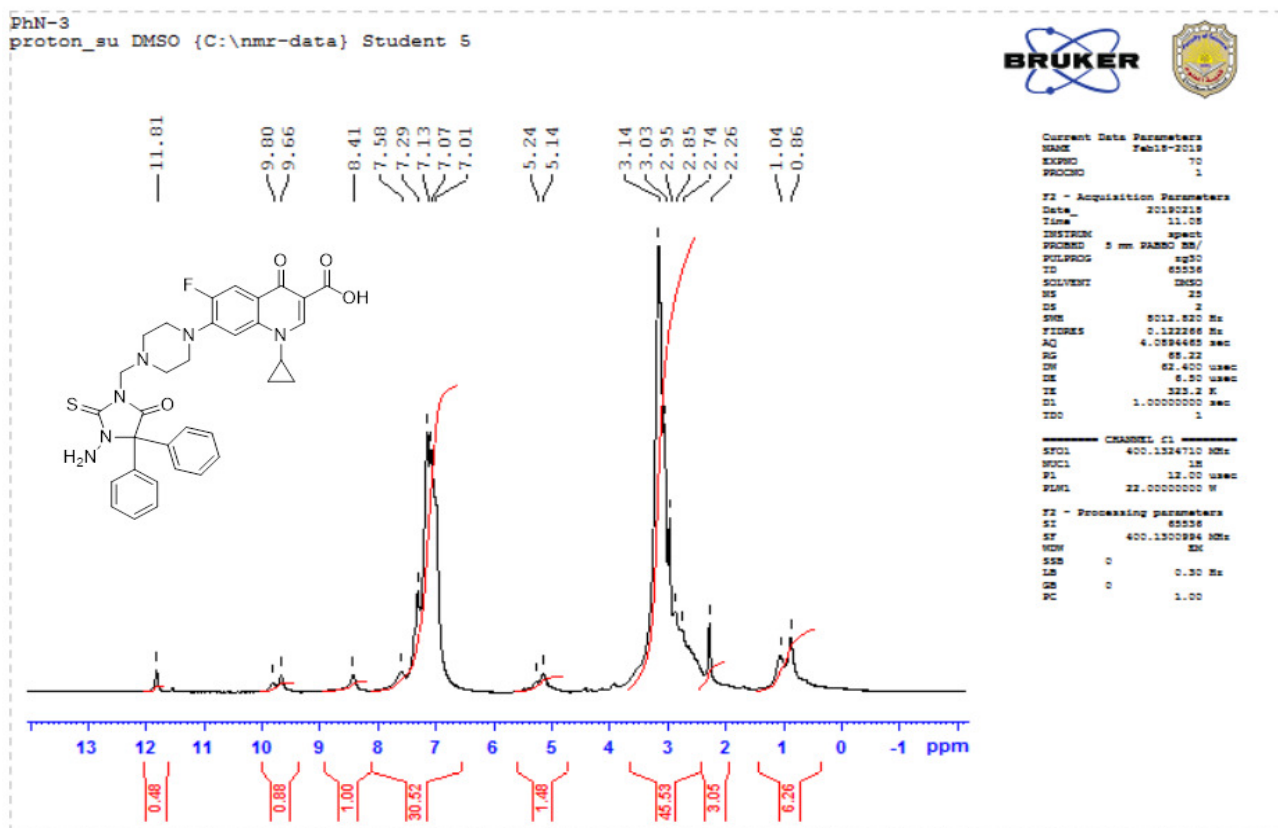





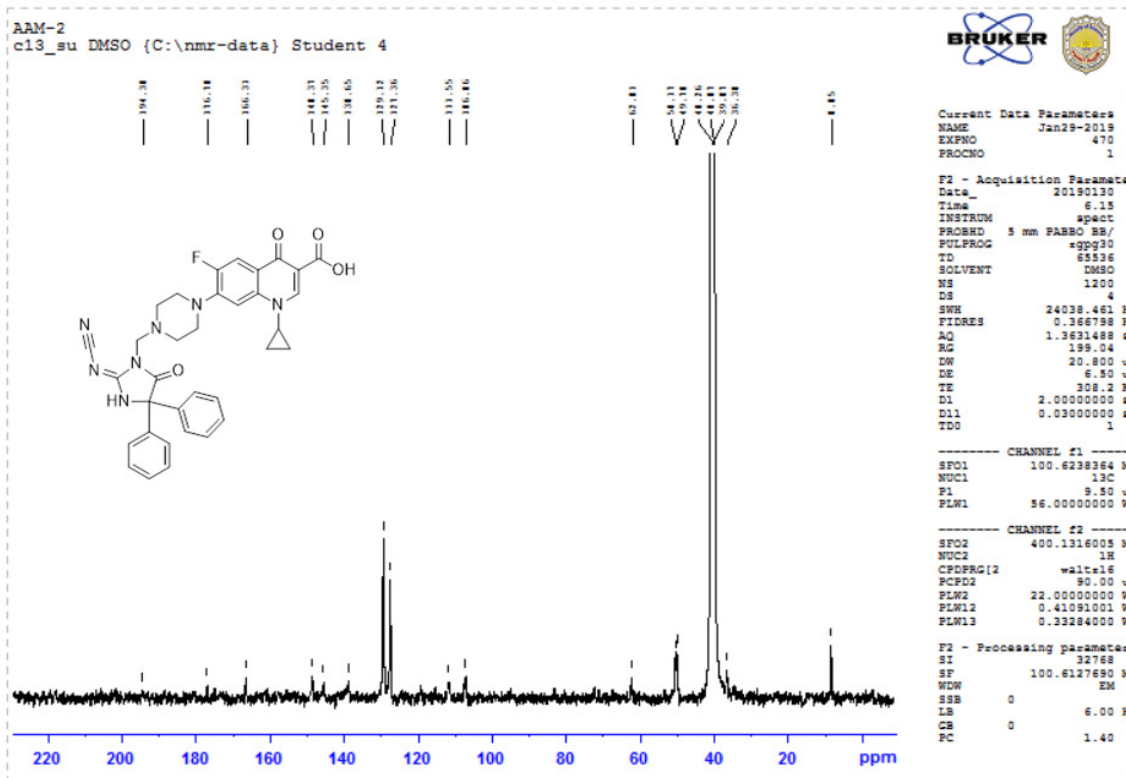

S16-  $^1\text{H}$ ,  $^{13}\text{C}$  NMR and dept-135 Spectra of 16

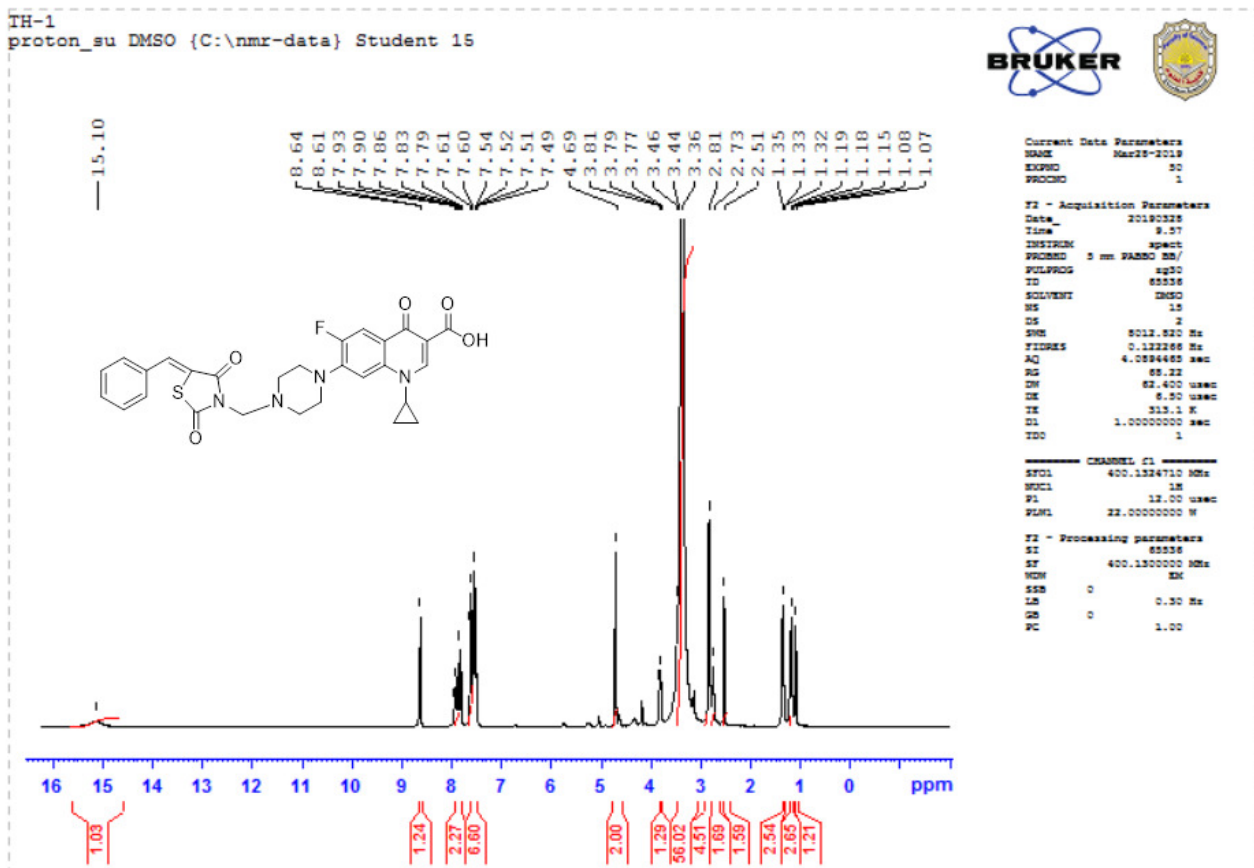



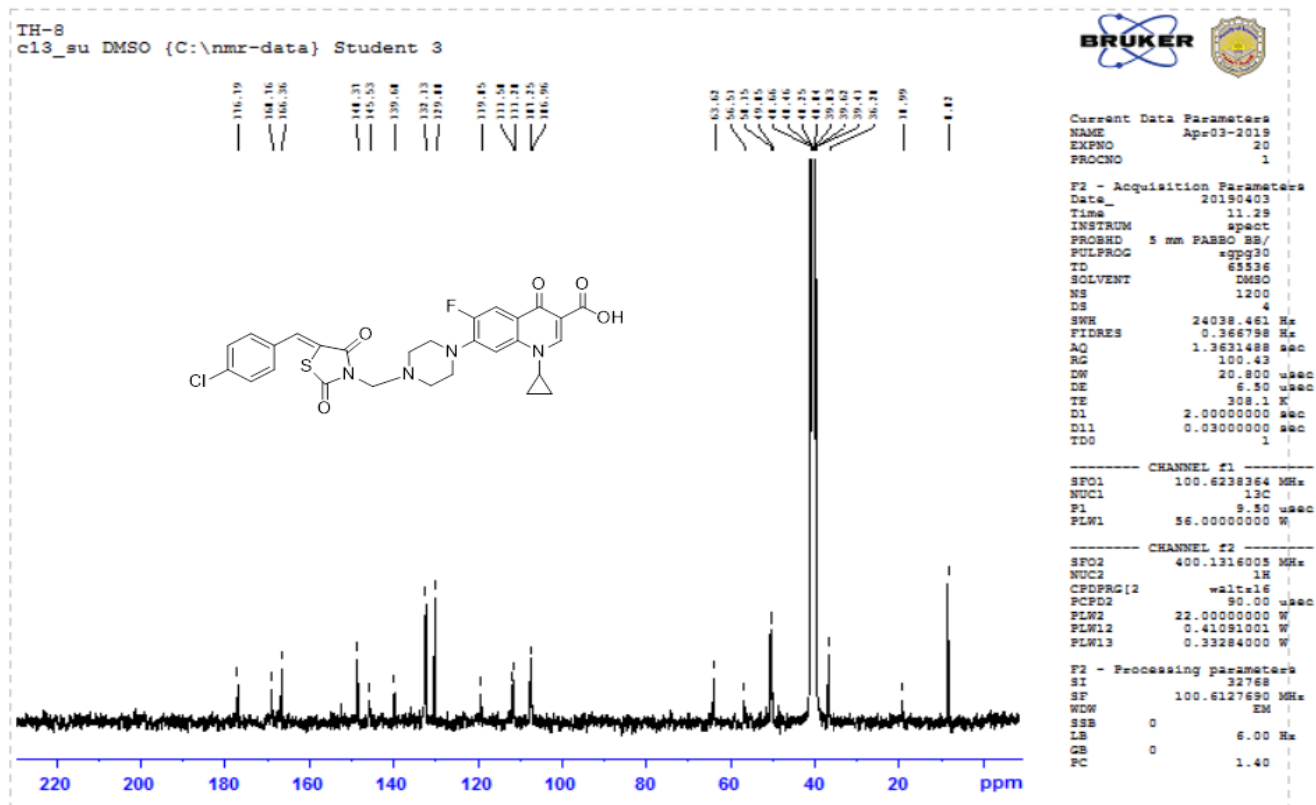

S18-  $^1\text{H}$ ,  $^{13}\text{C}$  NMR and dept-135 Spectra of

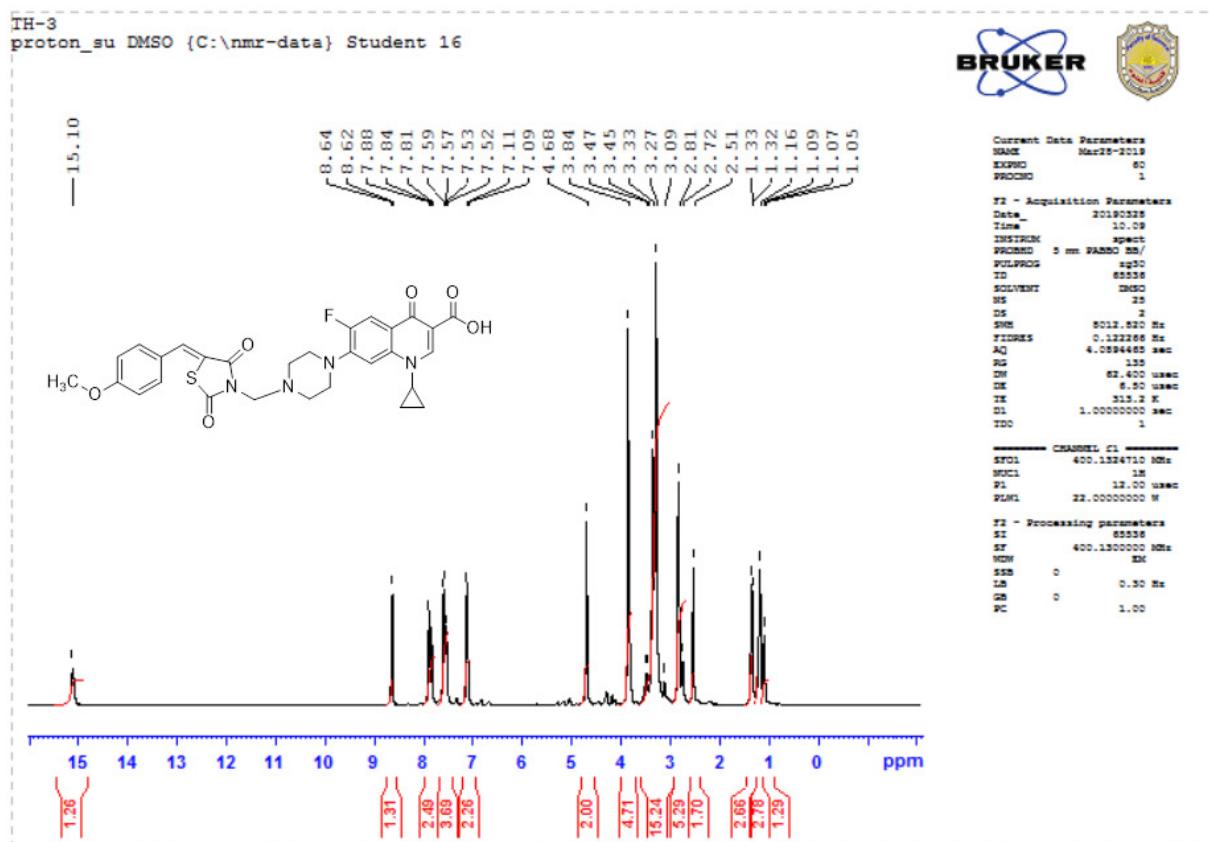

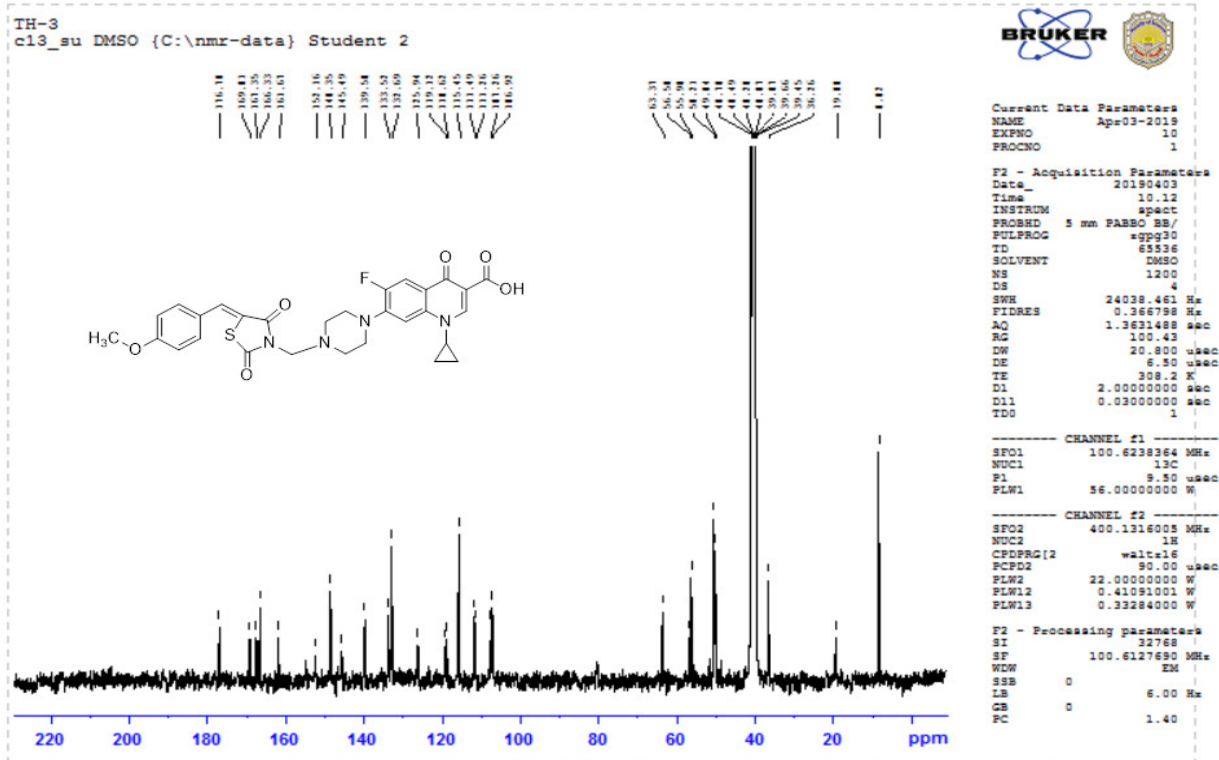

S19-  $^1\text{H}$ ,  $^{13}\text{C}$  NMR and dept-135 Spectra of 19

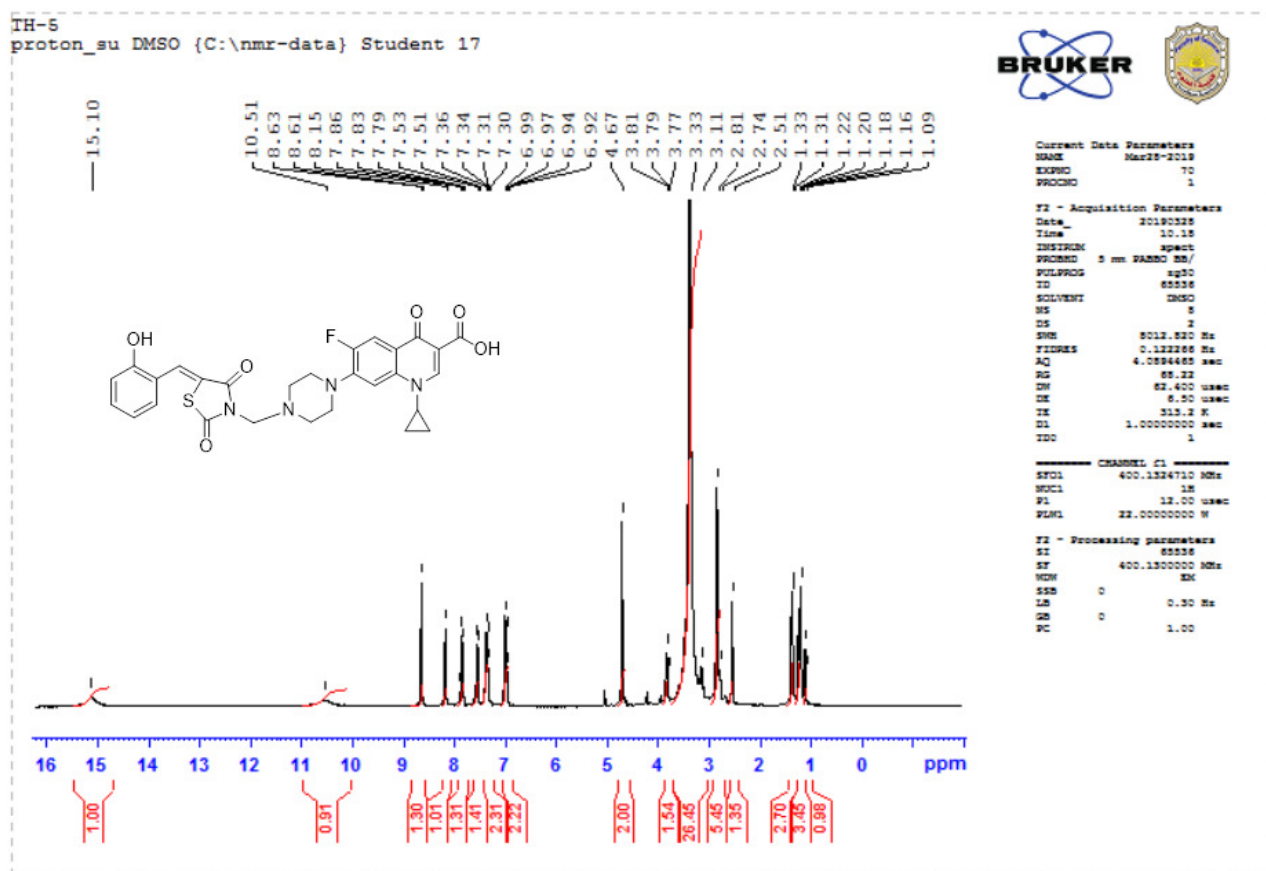



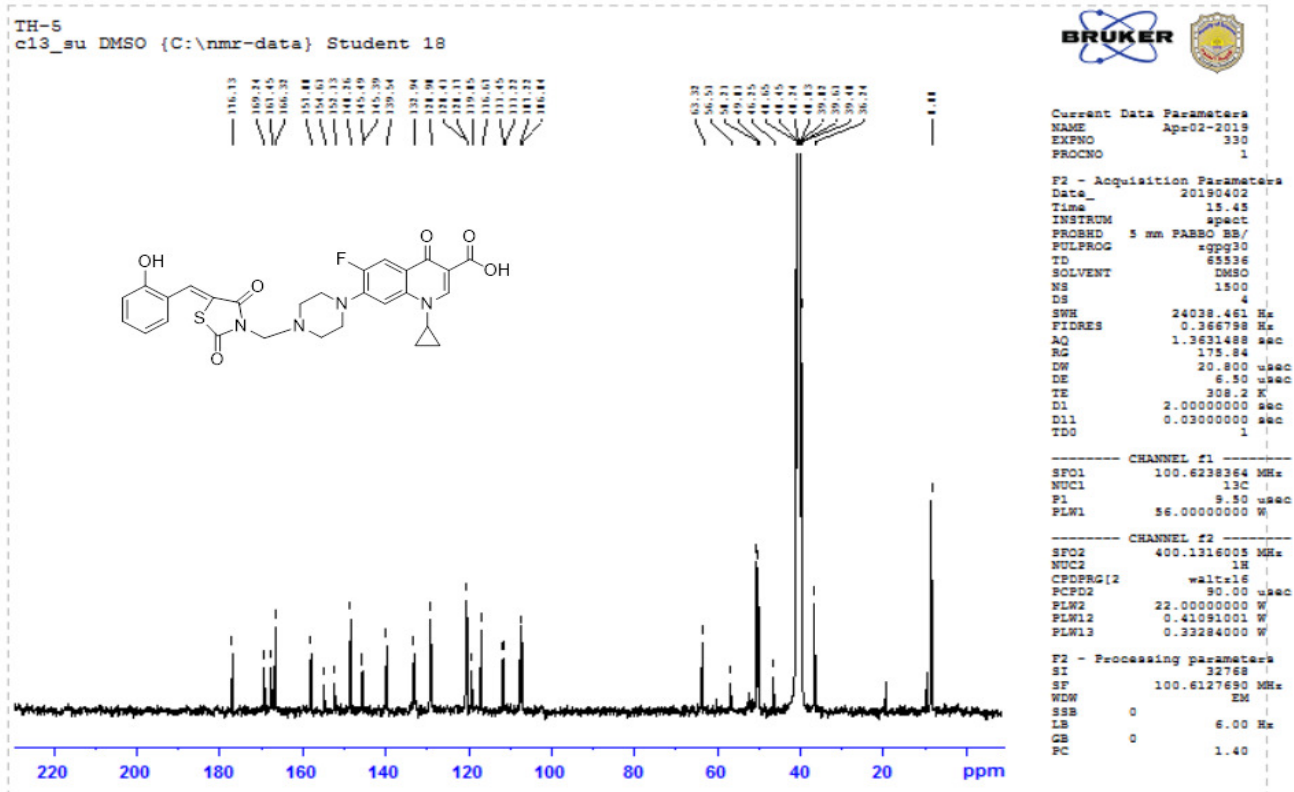

S20-  $^1\text{H}$ ,  $^{13}\text{C}$  NMR and dept-135 Spectra of 20

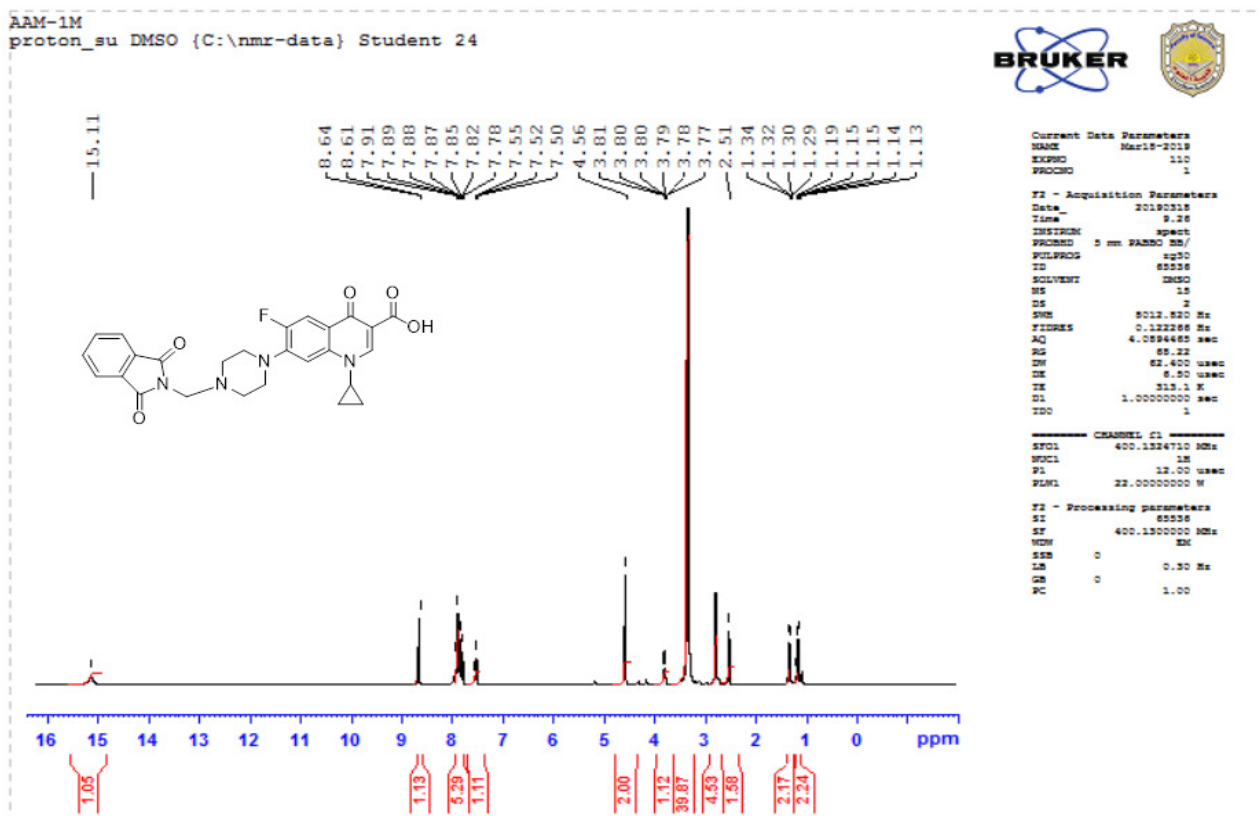

AAM-1-M  
c13\_su DMSO {C:\nmr-data} Student 20

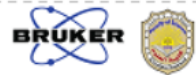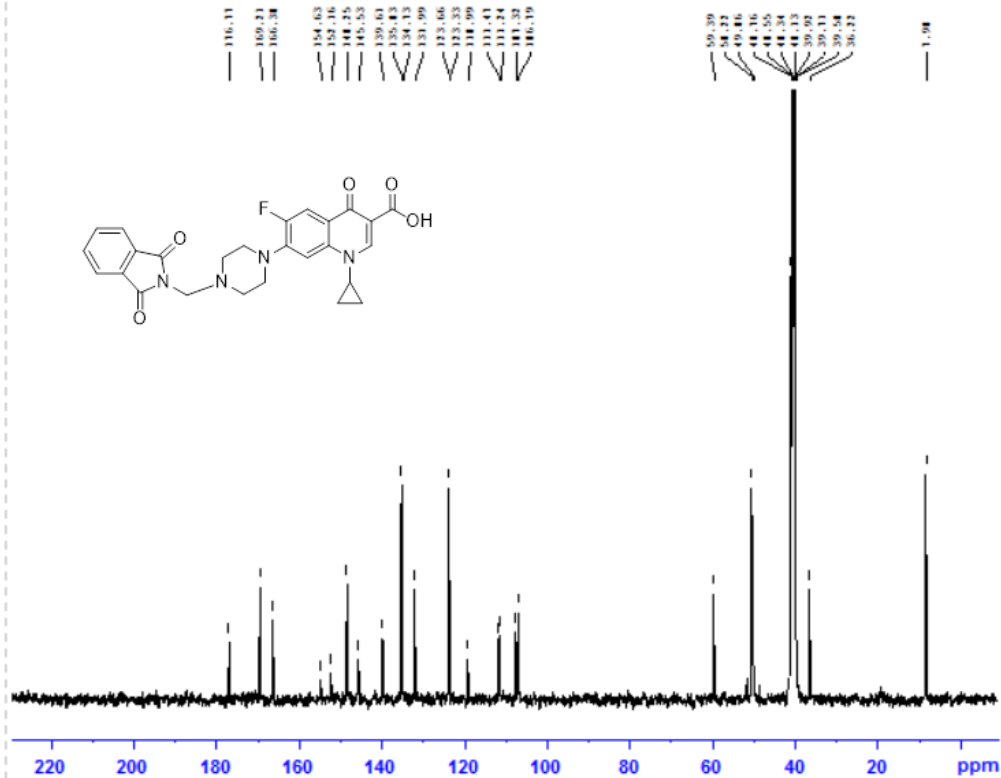

Current Data Parameters  
NAME Mar26-2019  
EXPNO 70  
PROCNO 1

F2 - Acquisition Parameters  
Date\_ 20190326  
Time 11.55  
INSTRUM spect  
PROBHD 5 mm PABBO BB/  
PULPROG zgpg30  
TD 65536  
SOLVENT DMSO  
NS 1200  
DS 4  
SWH 24038.461 Hz  
FIDRES 0.366798 Hz  
AQ 1.3631488 sec  
RG 199.04  
DW 20.800 usec  
DE 6.50 usec  
TE 323.2 K  
D1 2.00000000 sec  
D11 0.03000000 sec  
TD0 1

CHANNEL f1  
SFO1 100.6238364 MHz  
NUC1 13C  
P1 9.50 usec  
PLW1 56.00000000 W

CHANNEL f2  
SFO2 400.1316005 MHz  
NUC2 1H  
CPOPRG[2] waltz16  
PCPD2 90.00 usec  
PLW2 22.00000000 W  
PLW12 0.41081001 W  
PLW13 0.33284000 W

F2 - Processing parameters  
SI 32768  
SF 100.6127690 MHz  
WDW EM  
SSB 0  
LB 6.00 Hz  
GB 0  
PC 1.40

S21-  $^1\text{H}$ ,  $^{13}\text{C}$  NMR and dept-135 Spectra of 21

AAM-2M  
proton\_su DMSO {C:\nmr-data} Student 1

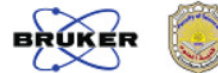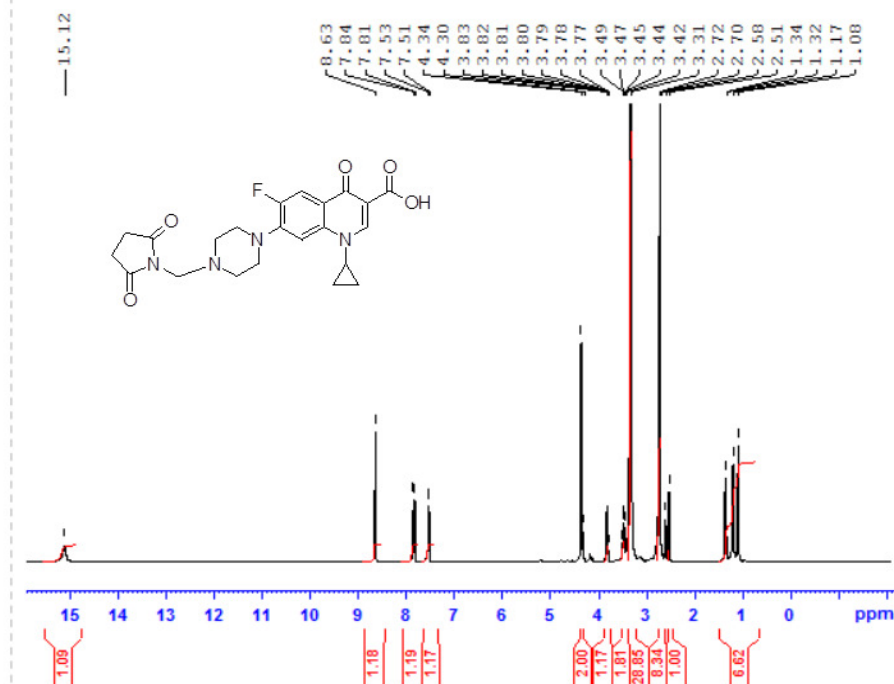

Current Data Parameters  
NAME Mar26-2019  
EXPNO 120  
PROCNO 1

F2 - Acquisition Parameters  
Date\_ 20190316  
Time 9.30  
INSTRUM spect  
PROBHD 5 mm PABBO BB/  
PULPROG zgpg30  
TD 65536  
SOLVENT DMSO  
NS 15  
DS 2  
SWH 5012.820 Hz  
FIDRES 0.122266 Hz  
AQ 4.0584465 sec  
RG 65.22  
DW 62.400 usec  
DE 6.50 usec  
TE 313.1 K  
D1 1.00000000 sec  
TD0 1

CHANNEL f1  
SFO1 400.1324710 MHz  
NUC1 1H  
P1 12.00 usec  
PLW1 22.00000000 W

F2 - Processing parameters  
SI 65536  
SF 400.1300000 MHz  
WDW EM  
SSB 0  
LB 0.50 Hz  
GB 0  
PC 1.00

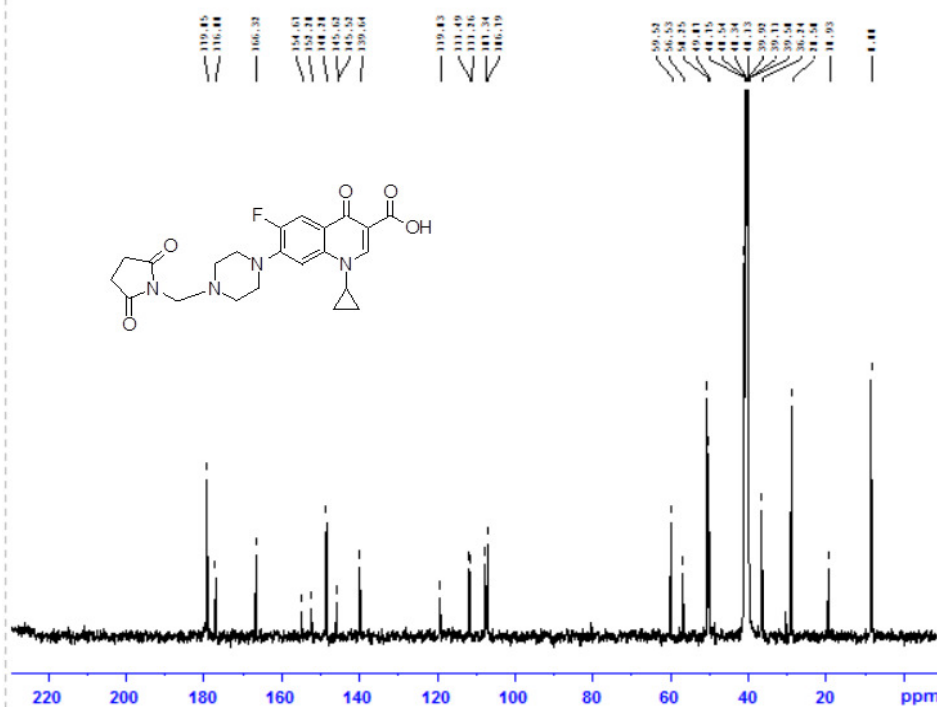

```

Current Data Parameters
NAME           Mar26-2019
EXPNO         110
PROCNO        1

F2 - Acquisition Parameters
Data_         20190326
Time_         13.41
INSTRUM       spect
PROBHD        5 mm F4BBO BB/
PULPROG       zgpg30
TD            65536
SOLVENT       DMSO
NS            1200
DS            4
SWH           24038.451
FIDRES        0.366789 Hz
AQ            1.3631488 sec
RG            199.04
DE            20.800      usec
CE            6.50      usec
TE            323.2 K
D1            2.00000000 sec
D11           0.03000000 sec
TD0           1

----- CHANNEL f1 -----
SF01          100.6238364 MHz
NUC1          13C
P1            9.50      usec
PLW1          56.00000000 W

----- CHANNEL f2 -----
SF02          400.1316005 MHz
NUC2          1H
CPDPRG2       waltz16
PCPD2         30.00      usec
PLW2          22.0000000 W
PLW12         0.41091001 W
PLW13         0.33284000 W

F2 - Processing parameters
SI            32768
SF            100.6127690 MHz
WDW           EM
SSB           0
LB            0.600 Hz
GB            0
PC            1.40

```



**Table S1****Molecular properties of compounds 1-21 predicted using Swiss ADME website.**

| <b>Molecule</b>               | <b>Comp 1</b>      | <b>Comp 2</b>      | <b>Comp 3</b>      | <b>Comp 4</b>      | <b>Comp 5</b>      | <b>Comp 6</b>      | <b>Comp 7</b>      |
|-------------------------------|--------------------|--------------------|--------------------|--------------------|--------------------|--------------------|--------------------|
| MW                            | 521.56             | 556.01             | 571.62             | 522.55             | 522.55             | 522.55             | 596.67             |
| Heavy atoms                   | 37                 | 38                 | 41                 | 37                 | 37                 | 37                 | 43                 |
| Aromatic heavy atoms          | 21                 | 21                 | 25                 | 21                 | 21                 | 21                 | 27                 |
| Fraction Csp3                 | 0.31               | 0.31               | 0.27               | 0.32               | 0.32               | 0.32               | 0.25               |
| Rotatable bonds               | 6                  | 6                  | 6                  | 6                  | 6                  | 6                  | 7                  |
| H-bond acceptors              | 7                  | 7                  | 7                  | 8                  | 8                  | 8                  | 6                  |
| H-bond donors                 | 1                  | 1                  | 1                  | 1                  | 1                  | 1                  | 1                  |
| MR                            | 145.25             | 150.26             | 162.76             | 143.05             | 143.05             | 143.05             | 172.31             |
| TPSA                          | 128.83             | 128.83             | 128.83             | 141.72             | 141.72             | 141.72             | 120.62             |
| iLOGP                         | 3.26               | 3.37               | 4.21               | 2.81               | 2.81               | 2.81               | 4.02               |
| XLOGP3                        | 1.47               | 2.1                | 2.72               | 0.73               | 0.73               | 0.73               | 2.63               |
| WLOGP                         | 3.58               | 4.24               | 4.74               | 2.98               | 2.98               | 2.98               | 4.78               |
| MLOGP                         | 2.43               | 2.9                | 3.05               | 1.46               | 1.46               | 1.46               | 3.66               |
| Silicos-IT Log P              | 3.58               | 4.23               | 4.58               | 3.02               | 3.02               | 3.02               | 4.19               |
| Consensus Log P               | 2.87               | 3.37               | 3.86               | 2.2                | 2.2                | 2.2                | 3.86               |
| ESOL Log S                    | -4.02              | -4.62              | -5.15              | -3.56              | -3.56              | -3.56              | -5.2               |
| ESOL Solubility (mg/ml)       | 4.94E-02           | 1.32E-02           | 4.02E-03           | 1.43E-01           | 1.43E-01           | 1.43E-01           | 3.77E-03           |
| ESOL Solubility (mol/l)       | 9.47E-05           | 2.38E-05           | 7.03E-06           | 2.73E-04           | 2.73E-04           | 2.73E-04           | 6.33E-06           |
| ESOL Class                    | Moderately soluble | Moderately soluble | Moderately soluble | Soluble            | Soluble            | Soluble            | Moderately soluble |
| Ali Log S                     | -3.78              | -4.44              | -5.08              | -3.28              | -3.28              | -3.28              | -4.81              |
| Ali Solubility (mg/ml)        | 8.62E-02           | 2.04E-02           | 4.76E-03           | 2.71E-01           | 2.71E-01           | 2.71E-01           | 9.17E-03           |
| Ali Solubility (mol/l)        | 1.65E-04           | 3.67E-05           | 8.33E-06           | 5.19E-04           | 5.19E-04           | 5.19E-04           | 1.54E-05           |
| Ali Class                     | Soluble            | Moderately soluble | Moderately soluble | Soluble            | Soluble            | Soluble            | Moderately soluble |
| Silicos-IT LogSw              | -5.81              | -6.38              | -7.42              | -5.43              | -5.43              | -5.43              | -7.4               |
| Silicos-IT Solubility (mg/ml) | 8.13E-04           | 2.31E-04           | 2.17E-05           | 1.93E-03           | 1.93E-03           | 1.93E-03           | 2.38E-05           |
| Silicos-IT Solubility (mol/l) | 1.56E-06           | 4.16E-07           | 3.80E-08           | 3.69E-06           | 3.69E-06           | 3.69E-06           | 3.98E-08           |
| Silicos-IT class              | Moderately soluble | Poorly soluble     | Poorly soluble     | Moderately soluble | Moderately soluble | Moderately soluble | Poorly soluble     |
| GI absorption                 | High               | Low                | Low                | Low                | Low                | Low                | Low                |
| BBB permeant                  | No                 |
| Pgp substrate                 | Yes                |
| CYP1A2 inhibitor              | No                 |
| CYP2C19 inhibitor             | Yes                | Yes                | Yes                | No                 | No                 | No                 | Yes                |
| CYP2C9 inhibitor              | Yes                |
| CYP2D6 inhibitor              | No                 | No                 | Yes                | No                 | No                 | No                 | Yes                |
| CYP3A4 inhibitor              | No                 | Yes                | No                 | Yes                | Yes                | Yes                | No                 |
| log Kp (cm/s)                 | -8.44              | -8.2               | -7.86              | -8.97              | -8.97              | -8.97              | -8.07              |
| Lipinski #violations          | 1                  | 1                  | 1                  | 1                  | 1                  | 1                  | 1                  |

|                          |      |      |      |      |      |      |      |
|--------------------------|------|------|------|------|------|------|------|
| Ghose #violations        | 2    | 2    | 2    | 2    | 2    | 2    | 3    |
| Veber #violations        | 0    | 0    | 0    | 1    | 1    | 1    | 0    |
| Egan #violations         | 0    | 0    | 0    | 1    | 1    | 1    | 0    |
| Muegge #violations       | 0    | 0    | 0    | 0    | 0    | 0    | 0    |
| Bioavailability Score    | 0.55 | 0.55 | 0.55 | 0.55 | 0.55 | 0.55 | 0.55 |
| PAINS #alerts            | 0    | 0    | 0    | 0    | 0    | 0    | 0    |
| Brenk #alerts            | 1    | 1    | 1    |      | 1    | 1    | 1    |
| Leadlikeness #violations | 1    | 1    | 1    |      | 1    | 1    | 1    |
| Synthetic Accessibility  | 3.88 | 3.93 | 4.12 |      | 3.92 | 3.92 | 4.28 |

Table S2

| Molecule                      | Comp 8         | Comp 9         | Comp 10        | Comp 11            | Comp 12            | Comp 13            | Comp 14            |
|-------------------------------|----------------|----------------|----------------|--------------------|--------------------|--------------------|--------------------|
| MW                            | 631.12         | 646.73         | 646.73         | 597.66             | 597.66             | 611.69             | 626.7              |
| Heavy atoms                   | 44             | 47             | 47             | 43                 | 43                 | 44                 | 45                 |
| Aromatic heavy atoms          | 27             | 31             | 31             | 27                 | 27                 | 22                 | 22                 |
| Fraction Csp3                 | 0.25           | 0.22           | 0.22           | 0.26               | 0.26               | 0.27               | 0.27               |
| Rotatable bonds               | 7              | 7              | 7              | 7                  | 7                  | 7                  | 7                  |
| H-bond acceptors              | 6              | 6              | 6              | 7                  | 7                  | 6                  | 7                  |
| H-bond donors                 | 1              | 1              | 1              | 1                  | 1                  | 2                  | 2                  |
| MR                            | 177.32         | 189.82         | 189.82         | 170.11             | 170.11             | 182.83             | 185.63             |
| TPSA                          | 120.62         | 120.62         | 120.62         | 133.51             | 133.51             | 130.21             | 147.44             |
| iLOGP                         | 3.88           | 4.01           | 4.01           | 3.66               | 3.45               | 4.17               | 4.05               |
| XLOGP3                        | 4.17           | 4.79           | 4.79           | 2.47               | 1.56               | 2.17               | 1.61               |
| WLOGP                         | 5.43           | 5.93           | 5.93           | 4.18               | 4.18               | 2.64               | 2.23               |
| MLOGP                         | 4.11           | 4.22           | 4.22           | 2.7                | 2.7                | 2.46               | 2.5                |
| Silicos-IT Log P              | 4.84           | 5.19           | 5.19           | 3.62               | 3.62               | 4.51               | 3.22               |
| Consensus Log P               | 4.49           | 4.83           | 4.83           | 3.33               | 3.1                | 3.19               | 2.72               |
| ESOL Log S                    | -6.37          | -6.89          | -6.89          | -5.1               | -4.53              | -4.91              | -4.64              |
| ESOL Solubility (mg/ml)       | 2.68E-04       | 8.26E-05       | 8.26E-05       | 4.70E-03           | 1.76E-02           | 7.57E-03           | 1.44E-02           |
| ESOL Solubility (mol/l)       | 4.24E-07       | 1.28E-07       | 1.28E-07       | 7.87E-06           | 2.94E-05           | 1.24E-05           | 2.29E-05           |
| ESOL Class                    | Poorly soluble | Poorly soluble | Poorly soluble | Moderately soluble | Moderately soluble | Moderately soluble | Moderately soluble |
| Ali Log S                     | -6.41          | -7.05          | -7.05          | -4.92              | -3.97              | -4.54              | -4.32              |
| Ali Solubility (mg/ml)        | 2.45E-04       | 5.70E-05       | 5.70E-05       | 7.22E-03           | 6.35E-02           | 1.77E-02           | 3.01E-02           |
| Ali Solubility (mol/l)        | 3.88E-07       | 8.81E-08       | 8.81E-08       | 1.21E-05           | 1.06E-04           | 2.90E-05           | 4.81E-05           |
| Ali Class                     | Poorly soluble | Poorly soluble | Poorly soluble | Moderately soluble | Soluble            | Moderately soluble | Moderately soluble |
| Silicos-IT LogSw              | -7.97          | -9.01          | -9.01          | -7.03              | -7.03              | -8.12              | -7.03              |
| Silicos-IT Solubility (mg/ml) | 6.76E-06       | 6.36E-07       | 6.36E-07       | 5.62E-05           | 5.62E-05           | 4.59E-06           | 5.84E-05           |
| Silicos-IT Solubility (mol/l) | 1.07E-08       | 9.84E-10       | 9.84E-10       | 9.40E-08           | 9.40E-08           | 7.50E-09           | 9.31E-08           |
| Silicos-IT class              | Poorly soluble | Poorly soluble | Poorly soluble | Poorly soluble     | Poorly soluble     | Poorly soluble     | Poorly soluble     |
| GI absorption                 | Low            | Low            | Low            | Low                | Low                | High               | Low                |
| BBB permeant                  | No             | No             | No             | No                 | No                 | No                 | No                 |
| Pgp substrate                 | Yes            | No             | No             | Yes                | Yes                | Yes                | Yes                |
| CYP1A2 inhibitor              | No             | No             | No             | No                 | No                 | No                 | No                 |
| CYP2C19 inhibitor             | Yes            | Yes            | Yes            | Yes                | Yes                | Yes                | No                 |
| CYP2C9 inhibitor              | Yes            | Yes            | Yes            | Yes                | Yes                | Yes                | Yes                |
| CYP2D6 inhibitor              | No             | No             | No             | Yes                | Yes                | Yes                | Yes                |

|                             |       |       |       |       |       |       |       |
|-----------------------------|-------|-------|-------|-------|-------|-------|-------|
| CYP3A4 inhibitor            | Yes   | No    | No    | Yes   | Yes   | Yes   | Yes   |
| log Kp (cm/s)               | -7.19 | -6.84 | -6.84 | -8.19 | -8.84 | -8.49 | -8.98 |
| Lipinski #violations        | 1     | 2     | 2     | 1     | 1     | 1     | 1     |
| Ghose #violations           | 3     | 4     | 4     | 3     | 3     | 3     | 3     |
| Veber #violations           | 0     | 0     | 0     | 0     | 0     | 0     | 1     |
| Egan #violations            | 0     | 1     | 1     | 1     | 1     | 0     | 1     |
| Muegge #violations          | 1     | 2     | 2     | 0     | 0     | 1     | 1     |
| Bioavailability Score       | 0.55  | 0.17  | 0.17  | 0.55  | 0.55  | 0.55  | 0.55  |
| PAINS #alerts               | 0     | 0     | 0     | 0     | 0     | 0     | 0     |
| Brenk #alerts               | 1     | 1     | 1     | 1     | 1     | 1     | 2     |
| Leadlikeness<br>#violations | 2     | 2     | 2     | 1     | 1     | 1     | 1     |
| Synthetic Accessibility     | 4.32  | 4.52  | 4.52  | 4.29  | 4.23  | 4.55  | 4.73  |

**Table S3**

| <b>Molecule</b>               | <b>Comp 15</b>     | <b>Comp 16</b>     | <b>Comp 17</b>     | <b>Comp 18</b>     | <b>Comp 19</b>     | <b>Comp 20</b>     | <b>Comp 21</b> |
|-------------------------------|--------------------|--------------------|--------------------|--------------------|--------------------|--------------------|----------------|
| MW                            | 626.7              | 548.59             | 583.03             | 578.61             | 564.58             | 490.48             | 442.44         |
| Heavy atoms                   | 45                 | 39                 | 40                 | 41                 | 40                 | 36                 | 32             |
| Aromatic heavy atoms          | 22                 | 16                 | 16                 | 16                 | 16                 | 16                 | 10             |
| Fraction Csp3                 | 0.27               | 0.29               | 0.29               | 0.31               | 0.29               | 0.31               | 0.45           |
| Rotatable bonds               | 7                  | 6                  | 6                  | 7                  | 6                  | 5                  | 5              |
| H-bond acceptors              | 7                  | 7                  | 7                  | 8                  | 8                  | 7                  | 7              |
| H-bond donors                 | 2                  | 1                  | 1                  | 1                  | 2                  | 1                  | 1              |
| MR                            | 185.63             | 157.26             | 162.27             | 163.75             | 159.28             | 139.95             | 124.47         |
| TPSA                          | 147.44             | 128.46             | 128.46             | 137.69             | 148.69             | 103.16             | 103.16         |
| iLOGP                         | 4.05               | 3.74               | 4.07               | 3.94               | 3.31               | 2.81               | 2.36           |
| XLOGP3                        | 1.61               | 1.64               | 2.26               | 1.61               | 1.28               | 0.16               | -1.6           |
| WLOGP                         | 2.23               | 3.1                | 3.75               | 3.1                | 2.8                | 1.76               | 0.62           |
| MLOGP                         | 2.5                | 2.05               | 2.51               | 1.48               | 1.55               | 1.72               | 1.11           |
| Silicos-IT Log P              | 3.22               | 2.92               | 3.57               | 3                  | 2.45               | 2.22               | 1.39           |
| Consensus Log P               | 2.72               | 2.69               | 3.23               | 2.63               | 2.28               | 1.74               | 0.78           |
| ESOL Log S                    | -4.64              | -4.18              | -4.78              | -4.27              | -4.05              | -2.98              | -1.48          |
| ESOL Solubility (mg/ml)       | 1.44E-02           | 3.61E-02           | 9.71E-03           | 3.12E-02           | 5.07E-02           | 5.13E-01           | 1.48E+01       |
| ESOL Solubility (mol/l)       | 2.29E-05           | 6.58E-05           | 1.66E-05           | 5.39E-05           | 8.98E-05           | 1.05E-03           | 3.34E-02       |
| ESOL Class                    | Moderately soluble | Soluble            | Very soluble   |
| Ali Log S                     | -4.32              | -3.95              | -4.59              | -4.11              | -4                 | -1.88              | -0.06          |
| Ali Solubility (mg/ml)        | 3.01E-02           | 6.15E-02           | 1.48E-02           | 4.46E-02           | 5.62E-02           | 6.41E+00           | 3.88E+02       |
| Ali Solubility (mol/l)        | 4.81E-05           | 1.12E-04           | 2.55E-05           | 7.70E-05           | 9.96E-05           | 1.31E-02           | 8.77E-01       |
| Ali Class                     | Moderately soluble | Soluble            | Moderately soluble | Moderately soluble | Moderately soluble | Very soluble       | Very soluble   |
| Silicos-IT LogSw              | -7.03              | -5.59              | -6.16              | -5.68              | -4.99              | -5.24              | -3.33          |
| Silicos-IT Solubility (mg/ml) | 5.84E-05           | 1.42E-03           | 4.03E-04           | 1.22E-03           | 5.74E-03           | 2.85E-03           | 2.08E-01       |
| Silicos-IT Solubility (mol/l) | 9.31E-08           | 2.59E-06           | 6.92E-07           | 2.10E-06           | 1.02E-05           | 5.81E-06           | 4.70E-04       |
| Silicos-IT class              | Poorly soluble     | Moderately soluble | Poorly soluble     | Moderately soluble | Moderately soluble | Moderately soluble | Soluble        |
| GI absorption                 | Low                | High               | High               | Low                | Low                | High               | High           |
| BBB permeant                  | No                 | No                 | No                 | No                 | No                 | No                 | No             |
| Pgp substrate                 | Yes                | Yes                | Yes                | Yes                | Yes                | Yes                | Yes            |
| CYP1A2 inhibitor              | No                 | No                 | No                 | No                 | No                 | No                 | No             |
| CYP2C19 inhibitor             | No                 | Yes                | Yes                | No                 | No                 | No                 | No             |
| CYP2C9 inhibitor              | Yes                | Yes                | Yes                | Yes                | Yes                | Yes                | No             |
| CYP2D6 inhibitor              | Yes                | No                 | No                 | No                 | No                 | No                 | No             |
| CYP3A4 inhibitor              | Yes                | Yes                | Yes                | Yes                | Yes                | No                 | No             |
| log Kp (cm/s)                 | -8.98              | -8.48              | -8.25              | -8.69              | -8.84              | -9.18              | -10.13         |

|                          |      |      |      |      |      |      |      |
|--------------------------|------|------|------|------|------|------|------|
| Lipinski #violations     | 1    | 1    | 1    | 1    | 1    | 0    | 0    |
| Ghose #violations        | 3    | 2    | 2    | 2    | 2    | 2    | 0    |
| Veber #violations        | 1    | 0    | 0    | 0    | 1    | 0    | 0    |
| Egan #violations         | 1    | 0    | 0    | 1    | 1    | 0    | 0    |
| Muegge #violations       | 1    | 0    | 0    | 0    | 0    | 0    | 0    |
| Bioavailability Score    | 0.55 | 0.55 | 0.55 | 0.55 | 0.55 | 0.55 | 0.55 |
| PAINS #alerts            | 0    | 0    | 0    | 0    | 0    | 0    | 0    |
| Brenk #alerts            | 2    | 2    | 2    | 2    | 2    | 1    | 1    |
| Leadlikeness #violations | 1    | 1    | 1    | 1    | 1    | 1    | 1    |
| Synthetic Accessibility  | 4.73 | 4.13 | 4.12 | 4.24 | 4.2  | 3.3  | 3.1  |
